# Supplementary material for: Text messaging support for patients with diabetes or coronary artery disease (SupportMe): protocol for a pragmatic randomised controlled trial
Source: PubMed Central journal article supplement — BMJ Open. 2019 Jun 19;9(6):e025923. doi: 10.1136/bmjopen-2018-025923 (PMC6589039; doi:10.1136/bmjopen-2018-025923), 2019-06-19
Supplement: bmjopen-2018-025923.draft_revisions.pdf [file bmjopen-2018-025923.draft_revisions.pdf]

# BMJ Open

BMJ Open is committed to open peer review. As part of this commitment we make the peer review history of every article we publish publicly available.

When an article is published we post the peer reviewers' comments and the authors' responses online. We also post the versions of the paper that were used during peer review. These are the versions that the peer review comments apply to.

The versions of the paper that follow are the versions that were submitted during the peer review process. They are not the versions of record or the final published versions. They should not be cited or distributed as the published version of this manuscript.

BMJ Open is an open access journal and the full, final, typeset and author-corrected version of record of the manuscript is available on our site with no access controls, subscription charges or pay-per-view fees (<http://bmjopen.bmj.com>).

If you have any questions on BMJ Open's open peer review process please email [info.bmjopen@bmj.com](mailto:info.bmjopen@bmj.com)

# BMJ Open

## Text messaging support for patients with diabetes or coronary artery disease (SupportMe): Protocol for a pragmatic randomised controlled trial

|                               |                                                                                                                                                                                                                                                                                                                                                                                                                                                                                                                                                                                            |
|-------------------------------|--------------------------------------------------------------------------------------------------------------------------------------------------------------------------------------------------------------------------------------------------------------------------------------------------------------------------------------------------------------------------------------------------------------------------------------------------------------------------------------------------------------------------------------------------------------------------------------------|
| Journal:                      | <i>BMJ Open</i>                                                                                                                                                                                                                                                                                                                                                                                                                                                                                                                                                                            |
| Manuscript ID                 | bmjopen-2018-025923                                                                                                                                                                                                                                                                                                                                                                                                                                                                                                                                                                        |
| Article Type:                 | Protocol                                                                                                                                                                                                                                                                                                                                                                                                                                                                                                                                                                                   |
| Date Submitted by the Author: | 08-Aug-2018                                                                                                                                                                                                                                                                                                                                                                                                                                                                                                                                                                                |
| Complete List of Authors:     | Cheung, N Wah; University of Sydney, Redfern, Julie; University of Sydney, Westmead Clinical School Thiagalingam, Aravinda; University of Sydney, Sydney, Australia, Sydney Medical School, ; Westmead Hospital, 3. Cardiology Department Hng, Tien-Ming; Blacktown Mount Druitt Hospital, Diabetes & Endocrinology Shariful Islam, Sheikh Mohammed; The George Institute for Global Health Haider, Rabbia; University of Sydney, Diabetes & Endocrinology Faruque, Sonia; Westmead Hospital, Diabetes & Endocrinology Chow, Clara; University of Sydney, Westmead Applied Research Centre |
| Keywords:                     | General diabetes < DIABETES & ENDOCRINOLOGY, Coronary heart disease < CARDIOLOGY, Clinical trials < THERAPEUTICS, Telemedicine < BIOTECHNOLOGY & BIOINFORMATICS                                                                                                                                                                                                                                                                                                                                                                                                                            |
|                               |                                                                                                                                                                                                                                                                                                                                                                                                                                                                                                                                                                                            |

SCHOLARONE™  
Manuscripts

1  
2  
3  
4 **Text messaging support for patients with diabetes or coronary artery disease**  
5  
6 **(SupportMe): Protocol for a pragmatic randomised controlled trial**  
7  
8

9  
10 N Wah Cheung<sup>1,2,3</sup>

11 Email: wah.cheung@sydney.edu.au  
12

13 Julie Redfern<sup>2,3</sup>

14 Email: julie.redfern@sydney.edu.au  
15  
16

17 Aravinda Thiagalingam<sup>1,2,3</sup>

18 Email: aravinda.thiagalingam@sydney.edu.au  
19  
20

21 Tien-Ming Hng<sup>4</sup>

22 Email: tien-ming.Hng@health.nsw.gov.au  
23  
24

25 Sheikh Mohammed Shariful Islam<sup>2</sup>

26 Email: SIslam@georgeinstitute.org.au  
27  
28

29 Rabbia Haider<sup>1,3</sup>

30 Email: Rabbia.Haider@health.nsw.gov.au  
31  
32

33 Sonia Faruquie<sup>1,3</sup>

34 Email: Sonia.Faruquie@health.nsw.gov.au  
35  
36

37 Clara K Chow<sup>1,2,3</sup>

38 Email: clara.chow@sydney.edu.au  
39  
40

41 On behalf of the SupportMe investigators  
42  
43  
44

45 <sup>1</sup>Westmead Hospital, Sydney, Australia

46  
47 <sup>2</sup>The George Institute for Global Health, Sydney, Australia

48  
49  
50 <sup>3</sup> University of Sydney, Faculty of Medicine and Health, Westmead Applied Research Centre,  
51 Westmead Clinical School  
52

53 <sup>4</sup>Blacktown Hospital, Sydney, Australia  
54  
55  
56  
57  
58  
59  
60

**Corresponding Author**

N Wah Cheung

Dept of Diabetes & Endocrinology

Westmead Hospital

Westmead NSW 2145

Australia

Email: [wah.cheung@sydney.edu.au](mailto:wah.cheung@sydney.edu.au)

Telephone: 612 88906796

**The SupportMe Investigators**

David Burgess, Bridie Carr, N Wah Cheung, Jin Gun Cho, Clara K Chow, Michael Crampton, Sonia Faruquie, Cate Ferry, Rabbia Haider, Alison Hayes, Tien-Ming Hng, Sheikh Mohammed Shariful Islam, Stephen Leeder, Simon Raadsma, Julie Redfern, Chris Rissel, Aravinda Thiagalingam

## ABSTRACT

### Introduction

Low-cost interventions providing self-management support are needed for people with coronary artery disease (CAD) and diabetes. Mobile phone text messaging provides a potential vehicle for this. The SupportMe Trial aims to assess the feasibility of embedding a text-messaging program into routine clinical practice, and will determine if this improves cardiovascular risk factor and diabetes control amongst patients with CAD or type 2 diabetes.

### Methods and Analysis

SupportMe is a randomised controlled trial to be conducted within the framework of a health district-wide integrated care program for people with CAD or T2DM. One thousand subjects will be recruited, with at least 500 in each group. Intervention subjects will receive 4 text messages a week for 6 months which provide advice, motivation, information and support for disease management and healthy behaviour. The primary outcome is the change in systolic blood pressure. Secondary outcomes include body mass index, waist circumference, low-density lipoprotein cholesterol, physical activity levels, dietary intake, quality of life, mood and smoking cessation, and for subjects with diabetes, glycosylated haemoglobin and fasting serum glucose. A process and economic evaluation will also be conducted.

### Ethics and Dissemination

The study has been approved by the Western Sydney Local Health District Human Research Ethics Committee (AU RED HREC/16/WMEAD/331). Results will be disseminated via the scientific forums including peer-reviewed publications and presentations at national and international conferences.

### Clinical Trials Registration

ACTRN12616001689460.

## Trial Commencement and Completion

Commencement: March 2017

Anticipated completion: June 2019

Current protocol V4.0, December 2017.

## Keywords

Randomised controlled trial, type 2 diabetes, coronary artery disease, text messaging

## Word Count

3772

## ARTICLE SUMMARY

### Strengths and Limitations of this Study

- This trial investigates the feasibility of incorporating a text-messaging intervention into routine clinical care across an entire health district.
- This study tests the effectiveness of a single text-messaging program which can be customised for people with more than one chronic disease.
- This trial will be the largest study examining the effectiveness of text messaging support for people with type 2 diabetes.
- The text messages will be provided in English only.
- The study outcomes relate mainly to cardiovascular risk and diabetes control, and not hard clinical outcomes such as major cardiovascular events.

## INTRODUCTION

Non-communicable diseases (NCDs) are the leading cause of death globally, accounting for 40 million, or 70% of the total deaths globally in 2015, rising by 14% since 2005<sup>1</sup>.

Cardiovascular disease (CVD) accounts for almost half of the NCD deaths. Diabetes caused 4% of the NCD deaths, but its impact is growing rapidly, up by 32% since 2005<sup>1</sup>. The International Diabetes Federation estimated the prevalence of diabetes worldwide was 8.3% in 2014, and projected to increase to 9.9% by 2030, to affect more than 500 million people<sup>2</sup>.

The major modifiable determinants of CVD are tobacco smoking, and the related risk factors of physical inactivity, unhealthy diet, hypertension, hypercholesterolaemia, and diabetes<sup>3</sup>. The incidence of CVD can be reduced by treatments and strategies which address these risk factors<sup>3,4</sup>. Early glucose and blood pressure control amongst people with type 2 diabetes may reduce mortality and diabetes complications<sup>5,6</sup>. Despite substantial evidence of clinical benefits, existing interventions are under-utilized and poor adherence to exercise, diet and smoking cessation are problematic<sup>7</sup>.

Information and communication technologies have great potential for the delivery of preventative and educational healthcare programs at a large scale and at low cost<sup>8</sup>. A systematic review reported that such technology used in the detection and follow up of CVD provided better clinical outcomes, mortality reduction and lower health services utilization<sup>9</sup>. Systematic reviews have also found that text-message interventions almost double the likelihood of short-term smoking cessation<sup>10</sup> and medication adherence<sup>11</sup>, and have provided some evidence of modest effects on weight loss<sup>12</sup>, hypertension<sup>13</sup> and physical activity<sup>14</sup>. Previous trials of text messaging for people with diabetes have generally been small but show promise for the improvement of glycaemic parameters<sup>13,15-17</sup>. However apart from smoking cessation, these programs have not been widely implemented or translated into routine healthcare for patients. Moreover, previous trials have generally focused on single diseases or conditions.

1  
2  
3 The Tobacco, Exercise and Diet Messages (TEXT ME) study of 710 patients with coronary  
4 heart disease (CHD) was the first randomised controlled trial which demonstrated that a  
5 text messaging program providing motivation, support and education improved multiple  
6 clinical risk factor measures including LDL-cholesterol, blood pressure, body mass index  
7 (BMI), physical activity and smoking cessation<sup>18</sup>. As part of our long-term goal of developing  
8 a text messaging program for people with different or multiple chronic diseases, we have  
9 now adapted the TEXT ME intervention to undertake a text messaging support program for  
10 people with 2 different chronic diseases, namely type 2 diabetes or coronary artery disease  
11 (CAD), or both. The intervention will provide education, clinical management support and  
12 healthy lifestyle motivation, with the aim of improving cardiovascular risk factors and  
13 diabetes care.  
14  
15  
16  
17  
18  
19  
20  
21  
22

23 Widespread delivery of text-message based education and support programs requires the  
24 intervention to be embedded into routine clinical care for people with chronic disease. This  
25 paper describes the protocol for the SupportMe randomised controlled trial. A major goal of  
26 SupportMe was to identify and address key questions in the implementation of text-  
27 message based education and support program into our existing health systems. Our test  
28 bed was the Western Sydney Local Health District (WSLHD) which serves a population of  
29 ~970,000 in Western Sydney, Australia.  
30  
31  
32  
33  
34  
35  
36  
37  
38

## 39 **METHODS AND ANALYSIS**

### 44 **Study Design, Setting and Population**

45 SupportMe is a pragmatic randomised clinical trial of 1000 patients with CAD and/or type 2  
46 diabetes (Fig 1). The study will be conducted in the ethnically and culturally diverse WSLHD  
47 but will also accept subjects from other health districts. Participants will be recruited via  
48 referrals from the community and hospital setting. We will leverage the framework of the  
49 Western Sydney Integrated Care Program (WSICP)<sup>19</sup> which involves over 200 general  
50 practitioners and 50 hospital clinicians to encourage referral to the SupportMe program.  
51  
52  
53  
54  
55  
56  
57  
58  
59  
60



1  
2  
3 The WSICP seeks to improve health outcomes for patients with chronic disease and improve  
4 the continuity of care across hospital and primary care services across the health district.  
5  
6  
7

8 The program will be advertised to hospital clinicians via internal hospital communication  
9 pathways and to the general practitioners (GPs) through the Western Sydney Primary  
10 Health Network (which supports GPs). We will provide a variety of referral options including  
11 traditional letter-based referrals, fax, phone, email, SMS as well as e-referral through an  
12 internet portal.  
13  
14  
15

16  
17  
18 To be eligible, subjects need to be 18 years or older, with i) CAD, defined as history of prior  
19 myocardial infarction or documented >50% of major coronary artery on invasive or non-  
20 invasive coronary angiography, and/or ii) type 2 diabetes, with an HbA1c in the last 6  
21 months of 7.1%-11.4% (54-101 mmol/mol). Subjects need to own a mobile phone and be  
22 able to read text messages in English. We will allocate each referred patient with a  
23 screening ID number and maintain a "screening log" of referred subjects, which records  
24 basic demographic data, as well as the referral source. We will also record reasons for  
25 ineligibility and non-participation. Research assistants will assess the eligibility of subjects  
26 referred to SupportMe, explain the details of the study, and obtain consent from those who  
27 wish to proceed into the study. For subjects who enter the SupportMe trial, we will keep an  
28 "enrolment log" and we will notify their referring clinician and their GP (if this was not the  
29 referrer).  
30  
31  
32  
33  
34  
35  
36  
37  
38  
39  
40  
41  
42

### 43 **Randomisation**

44 Randomisation will be in a uniform allocation of 1:1, with a block size of 8, stratified by  
45 health condition (CHD, Diabetes or CHD and Diabetes), and performed through an electronic  
46 platform. Personnel collecting baseline data will be blinded to treatment allocation. The  
47 computerised platform will connect with the text messaging platform to commence sending  
48 messages to the intervention subjects automatically based on randomisation. To minimise  
49 un-blinding at follow-up, participants will be sent a message reminding them not to reveal  
50 treatment allocation to follow-up data collectors.  
51  
52  
53  
54  
55  
56  
57  
58  
59  
60

1  
2  
3 The secure web-based Research Electronic Data Capture (REDCap) web application will be  
4 used for participant registration and data collection. Each subject who proceeded to the  
5 study will be assigned a unique study identification number in REDCap, and their name,  
6 initials, date of birth and contact details will not be recorded to ensure that the dataset is  
7 de-identified.  
8  
9  
10

### 11 12 13 **Intervention and Control**

14  
15 The SupportMe intervention is a simple patient-centred intervention designed to provide  
16 semi-personalised and customised support in clinical and lifestyle management, as an  
17 adjunct to standard care provided by the subjects' usual healthcare professionals.  
18  
19 Participants allocated to intervention will receive four text messages per week that will be  
20 sent at random times between 9am and 5 pm during weekdays, over a 6 month period.  
21  
22 These will be unidirectional, in that subjects will be sent messages but be advised that there  
23 is no expectation that they respond back nor is there a facility to interact with or discuss  
24 their specific health issues with the study team. However, a researcher will monitor  
25 messages sent from participants, and a record of these will be maintained. Where there are  
26 return messages which are a potential cause for clinical concern, the message will be  
27 escalated to a doctor for review. This researcher will not participate in any other data  
28 collection or individual level of analysis.  
29  
30  
31  
32  
33  
34  
35  
36  
37

38 Control subjects will only receive a welcome message at the initiation of their participation  
39 in the trial, and a message at 6 months reminding them of their follow-up appointment. It is  
40 expected that both intervention and control participants will continue receiving usual care  
41 from their regular health professionals.  
42  
43  
44  
45

46 All participants will be offered brief training at enrolment on how to read a text message  
47 and how to delete or save messages. Participants may withdraw from the study at any time  
48 via a text message; in which case a team member will contact the participant regarding  
49 confirmation and the delivery of text messages to these subjects will be deactivated.  
50  
51  
52  
53  
54  
55  
56  
57  
58  
59  
60

1  
2  
3  
4 At the end of the 6 month program, maintenance messages will be sent to intervention  
5 subjects for a further 6 months at a frequency of 2 per week. Control subjects will be  
6 offered the opportunity to receive the SupportMe intervention at that point.  
7  
8  
9

### 10 11 12 **SupportMe Message Content** 13

14 The text message content and program structure was developed according to our previously  
15 published process<sup>20</sup>. The text messages provide advice, motivation, information and support  
16 for disease management, monitoring of risk factors, and tips and links to engage in healthy  
17 behaviours. Each of the 4 messages the intervention subjects receive each week will focus  
18 on a different aspect of healthcare, namely (1) general health, (2) nutrition, (3) physical  
19 activity, (4) disease self-management. A different set of 4 message banks was developed for  
20 each of the 3 strata in the study; CAD, diabetes, and CAD with diabetes, though there are a  
21 number of messages common to the 3 strata. In addition, there are subsets of messages  
22 which enable a degree of customisation. These are smoker and non-smoker, insulin user and  
23 non-insulin user, vegetarian and non-vegetarian. Messages from each bank will be sent in a  
24 random order until 26 weeks has passed.  
25  
26  
27  
28  
29  
30  
31  
32  
33  
34

35 Existing validated messages which were used in the TEXT ME trial were reviewed for use in  
36 SupportMe. Additional SupportMe messages, mainly related to diabetes, were developed by  
37 a working group including endocrinologists, diabetes educators, dietitians, podiatrists, and  
38 clinicians in primary care, community health, population health, existing health promotion  
39 programs and consumers. The process followed was similar to that applied to the TEXT ME  
40 program<sup>20,21</sup>, whereby the working group initially developed the text messages, then these  
41 were reviewed for readability and to ensure messages were presented with a positive focus.  
42 The text messages were modified based on feedback from the diabetes working group, and  
43 then underwent user testing with feedback and further modification. Examples of final text  
44 messages include: *"Did you exercise today?"*, *"Has your Dr checked & discussed your*  
45 *cholesterol levels with you recently? These need regular review"*, *"Healthy eating means at*  
46 *least 5 serves of vegetables & 2 serves of fruit every day"*, *"If your sugars are regularly under*  
47  
48  
49  
50  
51  
52  
53  
54  
55  
56  
57  
58  
59  
60

1  
2  
3 *4mmol/L or over 10mmol/L, it may be time to review your diabetes treatment - speak to*  
4 *your Doctor”.*  
5  
6  
7

8 Our TEXT ME message management engine will deliver the messages for SupportMe. It  
9 selects messages from message banks as per prespecified algorithms using patient baseline  
10 data entered into the message management system. The engine sends messages through a  
11 telecommunications gateway to enable them to be sent to all participants on any Australian  
12 phone network at no cost to the participant and at a bulk-rate cost to the study.  
13  
14  
15  
16  
17

### 18 **Study Outcomes**

19  
20 The primary outcome of the study is change in systolic blood pressure after 6 months. This  
21 will be measured by a digital sphygmomanometer, three times in the sitting position, with  
22 the mean of the last 2 readings being recorded. Secondary outcomes include body mass  
23 index, waist circumference, fasting low-density lipoprotein cholesterol, physical activity  
24 (measured by the Global Physical Activity Questionnaire<sup>22</sup>), quality of life (measured by the  
25 12 item short form (SF-12) health survey<sup>23</sup>), depression (measured by the Patient Health  
26 Questionnaire-9 depression scale<sup>24</sup>) and dietary intake (measured by the dietary component  
27 of the WHO STEPS instrument<sup>25</sup>), smoking cessation and medication use. Subjects with  
28 diabetes will also be evaluated for the additional secondary outcomes of HbA1c and fasting  
29 serum glucose. A composite outcome of guideline levels of risk factors achieved will also be  
30 analysed. Surveys and measurements will be conducted in face-to-face visits with research  
31 assistants who will be blinded to the subject’s treatment allocation.  
32  
33  
34  
35  
36  
37  
38  
39  
40  
41

42 The protocol requires the closing study visit to be undertaken within one month of the 6  
43 month time point. Study visits performed more than one month later will be regarded as  
44 protocol deviations, but nonetheless we will endeavour to capture the outcome data.  
45  
46  
47  
48

### 49 **Process Measures**

50  
51 Process data will be collected from referral information, participant surveys, focus groups  
52 and analytical information. The screening log will collect information regarding the source of  
53 subjects referred to SupportMe, to enable an assessment of its integration into the WSICP  
54 and level of clinician engagement. The screening log will also provide data for reasons that  
55  
56  
57  
58  
59  
60

1  
2  
3 subjects were not enrolled into the SupportMe program. Analytical data extracted from the  
4 message software system will provide information about the time that messages are sent  
5 and the proportion of text messages successfully delivered (eg, if mobile phone mail boxes  
6 are full) will be recorded. A log will be kept of non-protocol participant contact with the  
7 study team, the reason for contact and the method used for contact (eg, by telephone,  
8 email).

9  
10  
11  
12  
13  
14  
15 SupportMe participants allocated to the intervention group will be administered a User  
16 Survey at the 6-month follow-up assessment. This questionnaire explores the acceptability  
17 of the text messages, identification of which messages participants remembered, liked or  
18 disliked, what they did with messages (eg, kept them or deleted them immediately), their  
19 perceived utility of the text messages and their opinion regarding the intrusiveness, timing,  
20 language and content suitability of the text messages. To obtain a more in-depth  
21 understanding of the potential barriers and facilitators for integration into existing health  
22 services and individual level to uptake of this program, we will also conduct purposive semi-  
23 structured interviews with a subsample of participants in the intervention group. Sampling  
24 will continue until thematic saturation occurs. We anticipate from previous experience the  
25 need to conduct approximately 20 patient interviews. Our research group have extensive  
26 experience conducting such evaluations alongside RCTs.

### 37 38 39 **Economic Evaluation**

40  
41 We will conduct a cost-effectiveness and cost-utility analysis of SupportMe from a health  
42 sector perspective. The costs and health outcomes associated with the intervention will be  
43 compared in an incremental cost-effectiveness analysis. Direct health care costs will be  
44 determined by patient-level data linkage to the Medical Benefits Schedule (MBS) and  
45 Pharmaceutical Benefits Scheme (PBS). The MBS and PBS are government funded schemes  
46 which provide subsidies for non-hospital attendances to healthcare providers (eg: general  
47 practitioners, specialists and some allied health providers such as dietitians), and for  
48 pharmaceutical agents respectively. Cost of hospitalisations will be determined from  
49 hospital admission records. We will use the SF-12 to determine Quality Adjusted Life Years  
50 (QALYs) in a trial based cost-utility analysis. Observed changes in clinical risk factors e.g. LDL-

1  
2  
3 cholesterol will inform longer term modelling of serious events and hospitalisations over a  
4 lifetime and thus estimate longer term costs, and cost-effectiveness of the intervention. For  
5 type 2 diabetes, patient-level risk factors will include measures of HbA1c which will be used  
6 in a validated health economic model. The per patient costs of intervention delivery will be  
7 used to estimate total costs of scaling up the SupportMe program at a state or national  
8 level.  
9  
10  
11  
12

### 13 14 15 **Statistical analyses**

16 We plan to recruit 1000 subjects into the study, with at least 500 patients with each of  
17 diabetes or CHD. Applying data from our earlier TEXT ME study<sup>18</sup>, sample size estimates  
18 indicate that 707 subjects are required for 90% power to detect a difference of 2.5 mmHg in  
19 the primary outcome of systolic blood pressure between intervention and control groups.  
20 Within the strata of diabetes or CHD, a sample size of 500 would have >90% power to detect  
21 a 4 mmHg difference in SBP. Data from the Blood Pressure Lowering Treatment Trialist's  
22 Collaboration indicate that a reduction in BP of 5 mmHg reduces the risk of major  
23 cardiovascular events, irrespective of the form of pharmacotherapy<sup>26</sup>. We also planned for  
24 an adequate sample size to demonstrate an improvement in diabetes control, as measured  
25 by HbA1c. Applying local data regarding the distribution of HbA1c<sup>27</sup>, a sample size of 562 is  
26 required for 80% power to detect a difference of 0.26% in HbA1c in the diabetes cohort.  
27 This quantum of HbA1c reduction translates to a 5% reduction in risk of diabetes  
28 complications<sup>28</sup>. As we expect at least 20% of CHD patients to also have diabetes, there will  
29 be at least 600 patients with diabetes in the total 1000 subject cohort.  
30  
31  
32  
33  
34  
35  
36  
37  
38  
39  
40  
41

42 The study will follow the intention-to-treat principle for analyses and participants will be  
43 analysed at 6 months by original assigned groups. Baseline comparisons between groups  
44 will be undertaken by independent t-tests or Mann-Whitney tests for continuous variables  
45 and chi square tests for categorical variables.  
46  
47  
48  
49

50 Our primary analyses will be by analysis of covariance (ANCOVA) with baseline variables of  
51 analyses parameters used as covariates where appropriate. Heterogeneity of treatment on  
52 the primary endpoint will be assessed in pre-defined subgroups of baseline values for BP,  
53  
54  
55  
56  
57  
58  
59  
60

1  
2  
3 BMI, LDL-cholesterol, HbA1c, and background BP lowering therapy, ethnicity, age, gender,  
4 participation in the WSICP, and medical conditions.  
5  
6  
7  
8

## 9 **ETHICS, GOVERNANCE AND DISSEMINATION**

10  
11  
12  
13 The study has been approved by the Western Sydney Local Health District Human Research  
14 Ethics Committee. The study will adhere to the National Health and Medical Research  
15 Council ethical guidelines for human research. Written and informed consent will be  
16 obtained from all participants. The trial has been registered with the Australian New  
17 Zealand Clinical Trials Registry, ACTRN12616001689460. This includes all items from the  
18 World Health Organization Trial Registration Set.  
19  
20  
21  
22  
23

24  
25 The study will be administered by the George Institute and the University of Sydney, with  
26 the design and conduct overseen by a project management committee. This committee has  
27 expertise in large-scale clinical trials and qualitative research, economic analysis, clinical CVD  
28 and diabetes management and healthy policy implementation at both a local and national  
29 level. It includes investigators and partners in the program. The program will also report to  
30 the WSICP Steering Committee.  
31  
32  
33  
34  
35

36  
37 A data monitoring safety board comprising a clinician with expertise in diabetes, and a  
38 second with expertise in cardiology will evaluate all serious adverse events. A manual of  
39 procedures has been developed, outlining study procedures including definitions, study  
40 organisational structure, quality control, procedures for collection and recording of data,  
41 monitoring and audit of the study, procedures for patient withdrawal, non-compliance and  
42 protocol violations.  
43  
44  
45  
46  
47  
48

49 Only the chief investigators (NWC, JR, AT, TMH, CKC) and trial statistician will have access to  
50 the final de-identified dataset. The full protocols and de-identified dataset will be made  
51 available from the investigators on reasonable request, and subject to ethics approvals. The  
52 findings of this study will be disseminated via the usual scientific forums, including peer-  
53 reviewed publications and presentations at national and international conferences.  
54  
55  
56  
57  
58

1  
2  
3 Authorship will be based on the International Committee of Journal Editors guidelines. We  
4 have followed the SPIRIT reporting guidelines<sup>29</sup>.  
5  
6  
7  
8

## 9 **CONCLUSION**

10  
11  
12  
13 SupportMe will develop new evidence as to whether a single text messaging support  
14 program will improve clinical parameters for people with different chronic diseases, namely  
15 cardiovascular disease and diabetes, and whether this can be successfully implemented into  
16 a wider chronic disease program. The project will also provide an economic analysis and  
17 understanding of cost as well as barriers and enablers associated with implementation and  
18 patient satisfaction.  
19  
20  
21  
22  
23

24  
25 Information technology and communication are considered key enablers of successful  
26 integrated care programs<sup>30</sup>. However, this has largely focused on the use of information  
27 systems and communication between healthcare providers, rather than between the  
28 healthcare program and the patient. The mobile phone is increasingly being recognised as a  
29 simple everyday technology which can be used to provide information and self-  
30 management support directly to patients. Simple texting programs administered by  
31 computerised message management systems make them affordable, scalable and practical  
32 to deliver as an adjunct to our existing health services. There are already data that text-  
33 messaging can effectively improve clinical outcomes or parameters by supporting people  
34 with chronic diseases and conditions such as CVD, asthma, smoking and medication  
35 adherence<sup>18,31</sup>. As earlier discussed the previous data for diabetes has been mixed, and  
36 based on small trials, but a recent large randomised controlled trial has shown that a  
37 comprehensive text-messaging based diabetes support program significantly reduced  
38 HbA1c<sup>32</sup>.  
39  
40  
41  
42  
43  
44  
45  
46  
47  
48  
49

50  
51 The challenge now is to develop and test text messaging interventions which are adaptable  
52 to people with different or multiple chronic diseases, and to implement these as a part of  
53 routine care. Indeed, with the high prevalence of chronic diseases, large scale population  
54 health interventions are required. The low cost of text messaging systems without the need  
55  
56  
57  
58  
59



1  
2  
3 for routine input from a health professional, makes them ideally suited for this purpose. In  
4 Australia, 50% of the population has at least one of eight chronic diseases, and half of these  
5 people have at least two such conditions<sup>33</sup>. Cardiovascular disease is the disease group  
6 responsible for the highest expenditure<sup>33</sup>. With a high prevalence of chronic disease, and  
7 many people having multiple diseases, it is impractical for a patient to enrol in a separate  
8 text messaging program for each of their chronic conditions, or for busy clinicians to  
9 manage the complexity of referring their patients to different text messaging programs.  
10 SupportMe tests the effectiveness of an intervention for people with either CVD or diabetes,  
11 or both disorders, and paves the way for a multifaceted text messaging support program to  
12 be developed. A single text messaging system, which includes multiple customised modules  
13 for people with other prevalent chronic diseases such as chronic obstructive pulmonary  
14 disease, chronic kidney disease, and mental health disorders, as well as any combination of  
15 these disorders would be highly desirable.

16  
17  
18 For these individuals, better preventative care and fostering of self-management will  
19 decrease the need for access to tertiary services and hospitalisation. Provision of text  
20 message programs at the point of hospital or community health engagement will enable the  
21 health service to support larger numbers of patients at a low-cost, enhance patient  
22 involvement with their care and their perception of the health service supporting them.

23  
24  
25 A limitation of our program is that messages will be delivered in English only, and in a  
26 multicultural society such as Australia, we need to overcome language barriers to  
27 healthcare. We intend to develop messages in other languages for future text-messaging  
28 programs we plan to undertake. However, this is not a process of simple translation, as the  
29 messages need to be culturally and linguistically appropriate for each individual language  
30 group, and undergo a rigorous process of testing<sup>34</sup>.

31  
32  
33 In summary, by conducting SupportMe within the framework of the Western Sydney  
34 Integrated Care Program, and encouraging referrals from clinicians involved in the clinical  
35 services offered by the WSICP, we will be testing if a text messaging program can be  
36 successfully implemented as standard care for patients in a chronic disease integrated care  
37 program which runs across a large health district, and improve clinical outcomes. Ultimately,  
38

1  
2  
3 for a mobile health initiative to be successful beyond the life of a clinical trial, it has to be a  
4 part of standard care. This requires support from fund-holders in health services, to support  
5 it as part of a larger program, rather than being a stand-alone intervention.  
6  
7  
8  
9  
10

### 11 **Author contributions**

12 CKC, NWC, SMSI, JR, and AT conceived the original study concept. All authors contributed to  
13 the design of the study, protocol development, its implementation, and drafting of the  
14 manuscript.  
15  
16  
17  
18  
19

### 20 **Funding statement**

21 This study is funded by the Translational Research Grants Scheme of NSW Health. JR is  
22 funded by a NHMRC Career Development Fellowship [APP1143538]. CKC is funded by a  
23 Career Development Fellowship co-funded by the NHMRC and National Heart Foundation  
24 [APP1105447]. SMSI is funded by The George Institute for Global Health Post Doctorate  
25 Research Fellowship and has received funding from High Blood Pressure Research  
26 Foundation of Australia. RH is funded by a Westmead Hospital Jerry Koutts Scholarship.  
27  
28  
29  
30  
31  
32  
33

### 34 **Competing Interests**

35 None  
36  
37  
38

### 39 **Acknowledgements**

40 This study is supported by the Western Sydney Local Health District, Heart Foundation, New  
41 South Wales Agency for Clinical Innovation, Diabetes NSW, the University of Sydney, and the  
42 George Institute. We thank Caroline Wu and Tony Barry for setting up the Redcap database  
43 and SMS engine, project manager Sandra Bahamad, and the research assistants Lily Chen,  
44 Daniel McIntyre, Gilly Rosic and Shelley She.  
45  
46  
47  
48  
49  
50  
51  
52  
53  
54  
55  
56  
57  
58  
59  
60

## References

1. GBD 2015 Mortality and Causes of Death Collaborators. Global, regional, and national life expectancy, all-cause mortality, and cause-specific mortality for 249 causes of death, 1980-2015: a systematic analysis for the Global Burden of Disease Study 2015. *Lancet* 2016; 388: 1459-1544.
2. Whiting DR, Guariguata L, Weil C, Shaw J. IDF diabetes atlas: Global estimates of the prevalence of diabetes for 2011 and 2030. *Diabetes Res Clin Pract* 2011; 94: 311-321.
3. World Health Organization. Global status report on noncommunicable diseases 2014. WHO: Geneva, 2016.
4. Clark AM, Harlting L, Vandermeer B, McAlister FA. Meta-analysis: secondary prevention programs for patients with coronary artery disease. *Ann Intern Med* 2005; 143: 659-672.
5. UKPDS. Intensive blood-glucose control with sulphonylureas or insulin compared with conventional treatment and risk of complications in patients with type 2 diabetes (UKPDS 33). *Lancet* 1998; 352: 837-853.
6. Holman RR, Sanjoy KP, Bethel MA, Matthews DR, Neil HAW. 10-year follow-up of intensive glucose control in type 2 diabetes. *N Eng J Med* 2008; 359: 1577-1589.
7. Chow CK, Jolly S, Rao-Melachini P, Anand SS, Yusuf S. Association of diet, exercise, and smoking modification with risk of early cardiovascular events after acute coronary syndromes. *Circulation* 2010; 121: 750-758.
8. Chow CK, Arivarathna N, Islam SM, Thiagalingam A, Redfern J. mHealth in cardiovascular health care. *Heart Lung Circ* 2016; 25: 802-807.
9. García-Lizana F, Sarría-Santamera A. New technologies for chronic disease management and control: a systematic review. *J Telemedicine Telecare* 2007; 13: 62-68.
10. Whittaker R, McRobbie H, Bullen C, Rodgers A, Gu Y. Mobile phone-based interventions for smoking cessation. *Cochrane Database Syst Rev* 2016; 11: Cd006611.
11. Thakkar J, Kurup R, Laba TL et al. Mobile telephone text messaging for medication adherence in chronic disease: A meta-analysis. *JAMA Intern Med* 2016; 176: 340-9.
12. Siopis GT, Chey T, Allman-Farinelli M. A systematic review and meta-analysis of interventions for weight management using text messaging. *J Hum Nutr Diet* 2015; 28 Suppl 2: 1-15.

13. Muntaner A, Vidal Conti J, Palou P. Increasing physical activity through mobile device interventions: A systematic review. *Health Informatics J* 2016; 22: 45-69.
14. Klimis H, Khan EM, Kok C, Chow CK. The role of text messaging in cardiovascular risk factor optimisation. *Curr Cardiol Rep* 2017; 19: 4.
15. Arambepola C, Ricci-Cabello I, Manikavasagam P, Roberts N, French DP, Farmer A. The impact of automated brief messages promoting lifestyle changes delivered via mobile devices to people with type 2 diabetes: A systematic literature review and meta-analysis of controlled trials. *J Internet Res* 2016; 18: 1.
16. Buis LR, Hirzel L, Turske SA, Des Jardins TR, Yarandi H, Bondurant P. Use of a text message program to raise type 2 diabetes risk awareness and promote health behavior change (part II): assessment of participants' perceptions on efficacy. *J Med Internet Res* 2013; 15: e282.
17. Islam SMS, Niessen L, Ferrari U, Ali L, Seissler J, Lechner A. Effects of mobile phone SMS to improve glycemic control among patients with type 2 diabetes in Bangladesh: A prospective, parallel-group, randomized controlled trial. *Diabetes Care* 2015; 38: 112-113.
18. Chow CK, Redfern J, Hills GS et al. Effect of lifestyle-focused text messaging on risk factor modification in patients with coronary heart disease: a randomized clinical trial. *JAMA* 2015; 314: 1255-1263.
19. NSW Ministry of Health. Western Sydney Integrated Care Demonstrator. Available from: <http://www.health.nsw.gov.au/integratedcare/Pages/demo-western-syd.aspx>. Last accessed May 28, 2018.
20. Redfern J, Thiagalingam A, Jan S, Whittaker R, Hackett ML, Mooney J et al. Development of a set of mobile phone text messages designed for prevention of recurrent cardiovascular events. *Eur J Prev Cardiol* 2014; 21: 492-9.
21. Chow CK, Redfern J, Thiagalingam A et al. Design and rationale of the tobacco, exercise and diet messages (TEXT ME) trial of a text message-based intervention for ongoing prevention of cardiovascular disease in people with coronary disease: a randomised controlled trial protocol. *BMJ Open* 2012; 2: e000606.
22. World Health Organization. Global physical activity questionnaire (GPAQ) analysis guide. Geneva: World Health Organization, 2012.

- 1
- 2
- 3 23. Maruish, M., User's manual for the SF-12v2 Health Survey. Lincoln, RI: QualityMetric,
- 4 2012.
- 5
- 6 24. Williams LS, Brizendine EJ, Plue L, et al. Performance of the PHQ-9 as a screening tool
- 7 for depression after stroke. *Stroke* 2005;36:635e8.
- 8
- 9 25. The WHO STEPwise approach to chronic disease risk factor surveillance (STEPS).
- 10 Available from <http://www.who.int/ncds/surveillance/steps/instrument/en/>. Last
- 11 accessed June 3, 2018.
- 12
- 13 26. Blood Pressure Lowering Treatment Trialists' Collaboration. Blood pressure lowering
- 14 and major cardiovascular events in people with and without chronic kidney disease:
- 15 meta-analysis of randomised controlled trials. *Br Med J* 2013; 347:f5680.
- 16
- 17 27. Lam T, Hoffman DM, Cukier K et al. Temporal HbA1c patterns amongst patients with
- 18 type 2 diabetes referred for specialist care: Data from the S4S-DINGO-Diabetes
- 19 Informatics Group. *Diabetes Res Clin Pract* 2016; 116: 159-64.
- 20
- 21 28. Stratton, I.M., et al., Association of glycaemia with macrovascular and microvascular
- 22 complications of type 2 diabetes (UKPDS 35): prospective observational study. *Br Med J*
- 23 2000; 321: 405-412.
- 24
- 25 29. Chan A-W, Tetzlaff JM, Altman DG, Laupacis A, Gøtzsche PC, Krolež-Jerić K et al. SPIRIT
- 26 2013 Statement: Defining standard protocol items for clinical trials. *Ann Intern Med*
- 27 2013; 158: 200-207
- 28
- 29 30. Suter E, Oelke ND, Adair CE, Armitage GD. Ten key principles for successful health
- 30 systems integration. *Healthc Q* 2009; 13: 16-23.
- 31
- 32 31. Jones KR, Lekhak N, Kaewluang N. Using Mobile Phones and Short Message Service to
- 33 Deliver Self-Management Interventions for Chronic Conditions: A Meta-Review.
- 34 *Worldviews Evid Based Nurs* 2014; 11: 81-88.
- 35
- 36 32. Dobson R, Whittaker R, Jiang Y et al. Effectiveness of text message based, diabetes self
- 37 management support programme (SMS4BG): two arm, parallel randomised controlled
- 38 trial. *Br Med J* 2018; 361: k1959.
- 39
- 40 33. Australian Institute of Health and Welfare 2016. Australia's health 2016. Australia's
- 41 health series no. 15. Cat. no. AUS 199. Canberra: AIHW 2016.
- 42
- 43 34. Thakkar J, Karhikeyan G, Purohit G, Thakkar S, Sharma J, Verma S, et al. Development of
- 44 macaronic Hindi-English 'Hinglish' text message content for a coronary heart disease
- 45 secondary prevention programme. *Heart Asia* 2016; 8: 32-38.
- 46
- 47
- 48
- 49
- 50
- 51
- 52
- 53
- 54
- 55
- 56
- 57
- 58
- 59
- 60

**Statement of License to BMJ**

I, N Wah Cheung, the Corresponding Author of this article contained within the original manuscript which includes any diagrams & photographs, other illustrative material, video, film or any other material howsoever submitted by the Contributor(s) at any time and related to the Contribution ("the Contribution") have the right to grant on behalf of all authors and do grant on behalf of all authors, a licence to the BMJ Publishing Group Ltd and its licensees, to permit this Contribution (if accepted) to be published in BMJ Open and any other BMJ Group products and to exploit all subsidiary rights, as set out in the licence at: ([http://group.bmj.com/products/journals/instructions-for-authors/BMJOpen\\_licence.pdf](http://group.bmj.com/products/journals/instructions-for-authors/BMJOpen_licence.pdf))

For peer review only

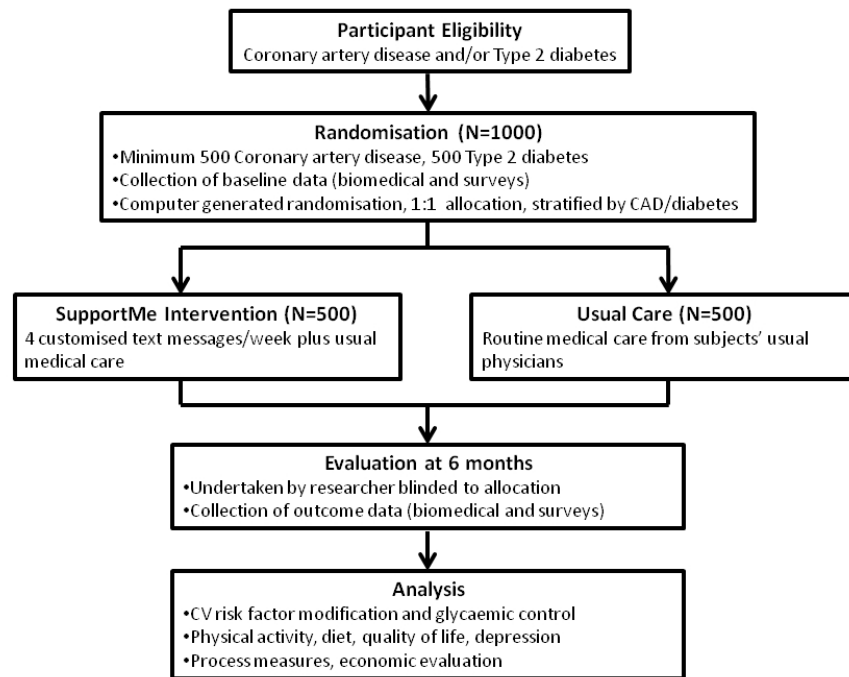

Figure 1: Summary of protocol

254x190mm (96 x 96 DPI)

# Reporting checklist for protocol of a clinical trial.

Based on the SPIRIT guidelines.

## Instructions to authors

Complete this checklist by entering the page numbers from your manuscript where readers will find each of the items listed below.

Your article may not currently address all the items on the checklist. Please modify your text to include the missing information. If you are certain that an item does not apply, please write "n/a" and provide a short explanation.

Upload your completed checklist as an extra file when you submit to a journal.

In your methods section, say that you used the SPIRIT reporting guidelines, and cite them as:

Chan A-W, Tetzlaff JM, Altman DG, Laupacis A, Gøtzsche PC, Krleža-Jerić K, Hróbjartsson A, Mann H, Dickersin K, Berlin J, Doré C, Parulekar W, Summerskill W, Groves T, Schulz K, Sox H, Rockhold FW, Rennie D, Moher D. SPIRIT 2013 Statement: Defining standard protocol items for clinical trials. *Ann Intern Med.* 2013;158(3):200-207

|                                             |                     | Reporting Item                                                                                               | Page Number |
|---------------------------------------------|---------------------|--------------------------------------------------------------------------------------------------------------|-------------|
| Title                                       | <a href="#">#1</a>  | Descriptive title identifying the study design, population, interventions, and, if applicable, trial acronym | 1           |
| Trial registration                          | <a href="#">#2a</a> | Trial identifier and registry name. If not yet registered, name of intended registry                         | 3, 13       |
| Trial registration: data set                | <a href="#">#2b</a> | All items from the World Health Organization Trial Registration Data Set                                     | 13          |
| Protocol version                            | <a href="#">#3</a>  | Date and version identifier                                                                                  | 4           |
| Funding                                     | <a href="#">#4</a>  | Sources and types of financial, material, and other support                                                  | 16          |
| Roles and responsibilities: contributorship | <a href="#">#5a</a> | Names, affiliations, and roles of protocol contributors                                                      | 1, 16       |
| Roles and responsibilities:                 | <a href="#">#5b</a> | Name and contact information for the trial sponsor                                                           | N/A         |



|    |                      |                      |                                                                   |          |
|----|----------------------|----------------------|-------------------------------------------------------------------|----------|
| 1  | sponsor contact      |                      |                                                                   |          |
| 2  | information          |                      |                                                                   |          |
| 3  |                      |                      |                                                                   |          |
| 4  | Roles and            | <a href="#">#5c</a>  | Role of study sponsor and funders, if any, in study design;       | N/A      |
| 5  | responsibilities:    |                      | collection, management, analysis, and interpretation of           |          |
| 6  | sponsor and funder   |                      | data; writing of the report; and the decision to submit the       |          |
| 7  |                      |                      | report for publication, including whether they will have          |          |
| 8  |                      |                      | ultimate authority over any of these activities                   |          |
| 9  |                      |                      |                                                                   |          |
| 10 |                      |                      |                                                                   |          |
| 11 |                      |                      |                                                                   |          |
| 12 | Roles and            | <a href="#">#5d</a>  | Composition, roles, and responsibilities of the coordinating      | 13       |
| 13 | responsibilities:    |                      | centre, steering committee, endpoint adjudication                 |          |
| 14 | committees           |                      | committee, data management team, and other individuals            |          |
| 15 |                      |                      | or groups overseeing the trial, if applicable (see Item 21a       |          |
| 16 |                      |                      | for data monitoring committee)                                    |          |
| 17 |                      |                      |                                                                   |          |
| 18 |                      |                      |                                                                   |          |
| 19 |                      |                      |                                                                   |          |
| 20 | Background and       | <a href="#">#6a</a>  | Description of research question and justification for            | 5-6, 14- |
| 21 | rationale            |                      | undertaking the trial, including summary of relevant studies      | 15       |
| 22 |                      |                      | (published and unpublished) examining benefits and harms          |          |
| 23 |                      |                      | for each intervention                                             |          |
| 24 |                      |                      |                                                                   |          |
| 25 |                      |                      |                                                                   |          |
| 26 |                      |                      |                                                                   |          |
| 27 | Background and       | <a href="#">#6b</a>  | Explanation for choice of comparators                             | 8        |
| 28 | rationale: choice of |                      |                                                                   |          |
| 29 | comparators          |                      |                                                                   |          |
| 30 |                      |                      |                                                                   |          |
| 31 |                      |                      |                                                                   |          |
| 32 | Objectives           | <a href="#">#7</a>   | Specific objectives or hypotheses                                 | 6, 14    |
| 33 |                      |                      |                                                                   |          |
| 34 |                      |                      |                                                                   |          |
| 35 | Trial design         | <a href="#">#8</a>   | Description of trial design including type of trial (eg, parallel | 6-7      |
| 36 |                      |                      | group, crossover, factorial, single group), allocation ratio,     |          |
| 37 |                      |                      | and framework (eg, superiority, equivalence, non-                 |          |
| 38 |                      |                      | inferiority, exploratory)                                         |          |
| 39 |                      |                      |                                                                   |          |
| 40 |                      |                      |                                                                   |          |
| 41 |                      |                      |                                                                   |          |
| 42 | Study setting        | <a href="#">#9</a>   | Description of study settings (eg, community clinic,              | 7        |
| 43 |                      |                      | academic hospital) and list of countries where data will be       |          |
| 44 |                      |                      | collected. Reference to where list of study sites can be          |          |
| 45 |                      |                      | obtained                                                          |          |
| 46 |                      |                      |                                                                   |          |
| 47 |                      |                      |                                                                   |          |
| 48 | Eligibility criteria | <a href="#">#10</a>  | Inclusion and exclusion criteria for participants. If             | 7        |
| 49 |                      |                      | applicable, eligibility criteria for study centres and            |          |
| 50 |                      |                      | individuals who will perform the interventions (eg,               |          |
| 51 |                      |                      | surgeons, psychotherapists)                                       |          |
| 52 |                      |                      |                                                                   |          |
| 53 |                      |                      |                                                                   |          |
| 54 |                      |                      |                                                                   |          |
| 55 | Interventions:       | <a href="#">#11a</a> | Interventions for each group with sufficient detail to allow      | 8-10     |
| 56 | description          |                      | replication, including how and when they will be                  |          |
| 57 |                      |                      | administered                                                      |          |
| 58 |                      |                      |                                                                   |          |
| 59 |                      |                      |                                                                   |          |
| 60 |                      |                      |                                                                   |          |

|                                                                |                                    |                      |                                                                                                                                                                                                                                                                                                                                                                                |                 |
|----------------------------------------------------------------|------------------------------------|----------------------|--------------------------------------------------------------------------------------------------------------------------------------------------------------------------------------------------------------------------------------------------------------------------------------------------------------------------------------------------------------------------------|-----------------|
| 1<br>2<br>3<br>4<br>5<br>6<br>7                                | Interventions:<br>modifications    | <a href="#">#11b</a> | Criteria for discontinuing or modifying allocated interventions for a given trial participant (eg, drug dose change in response to harms, participant request, or improving / worsening disease)                                                                                                                                                                               | N/A             |
| 8<br>9<br>10<br>11<br>12                                       | Interventions:<br>adherence        | <a href="#">#11c</a> | Strategies to improve adherence to intervention protocols, and any procedures for monitoring adherence (eg, drug tablet return; laboratory tests)                                                                                                                                                                                                                              | N/A             |
| 13<br>14<br>15<br>16                                           | Interventions:<br>concomitant care | <a href="#">#11d</a> | Relevant concomitant care and interventions that are permitted or prohibited during the trial                                                                                                                                                                                                                                                                                  | N/A             |
| 17<br>18<br>19<br>20<br>21<br>22<br>23<br>24<br>25<br>26<br>27 | Outcomes                           | <a href="#">#12</a>  | Primary, secondary, and other outcomes, including the specific measurement variable (eg, systolic blood pressure), analysis metric (eg, change from baseline, final value, time to event), method of aggregation (eg, median, proportion), and time point for each outcome. Explanation of the clinical relevance of chosen efficacy and harm outcomes is strongly recommended | 10-12           |
| 28<br>29<br>30<br>31<br>32<br>33<br>34                         | Participant timeline               | <a href="#">#13</a>  | Time schedule of enrolment, interventions (including any run-ins and washouts), assessments, and visits for participants. A schematic diagram is highly recommended (see Figure)                                                                                                                                                                                               | 10,<br>Figure 1 |
| 35<br>36<br>37<br>38<br>39<br>40<br>41                         | Sample size                        | <a href="#">#14</a>  | Estimated number of participants needed to achieve study objectives and how it was determined, including clinical and statistical assumptions supporting any sample size calculations                                                                                                                                                                                          | 12              |
| 42<br>43<br>44<br>45                                           | Recruitment                        | <a href="#">#15</a>  | Strategies for achieving adequate participant enrolment to reach target sample size                                                                                                                                                                                                                                                                                            | 6-7             |
| 46<br>47<br>48<br>49<br>50<br>51<br>52<br>53<br>54<br>55<br>56 | Allocation: sequence<br>generation | <a href="#">#16a</a> | Method of generating the allocation sequence (eg, computer-generated random numbers), and list of any factors for stratification. To reduce predictability of a random sequence, details of any planned restriction (eg, blocking) should be provided in a separate document that is unavailable to those who enrol participants or assign interventions                       | 7               |
| 57<br>58<br>59<br>60                                           | Allocation<br>concealment          | <a href="#">#16b</a> | Mechanism of implementing the allocation sequence (eg, central telephone; sequentially numbered, opaque, sealed                                                                                                                                                                                                                                                                | 7               |

|    |                        |                      |                                                                                                                                                                                                                                                                                                                                                                                                              |              |
|----|------------------------|----------------------|--------------------------------------------------------------------------------------------------------------------------------------------------------------------------------------------------------------------------------------------------------------------------------------------------------------------------------------------------------------------------------------------------------------|--------------|
| 1  | mechanism              |                      | envelopes), describing any steps to conceal the sequence until interventions are assigned                                                                                                                                                                                                                                                                                                                    |              |
| 2  |                        |                      |                                                                                                                                                                                                                                                                                                                                                                                                              |              |
| 3  |                        |                      |                                                                                                                                                                                                                                                                                                                                                                                                              |              |
| 4  | Allocation:            | <a href="#">#16c</a> | Who will generate the allocation sequence, who will enrol participants, and who will assign participants to interventions                                                                                                                                                                                                                                                                                    | 7            |
| 5  | implementation         |                      |                                                                                                                                                                                                                                                                                                                                                                                                              |              |
| 6  |                        |                      |                                                                                                                                                                                                                                                                                                                                                                                                              |              |
| 7  |                        |                      |                                                                                                                                                                                                                                                                                                                                                                                                              |              |
| 8  |                        |                      |                                                                                                                                                                                                                                                                                                                                                                                                              |              |
| 9  | Blinding (masking)     | <a href="#">#17a</a> | Who will be blinded after assignment to interventions (eg, trial participants, care providers, outcome assessors, data analysts), and how                                                                                                                                                                                                                                                                    | 7, 10        |
| 10 |                        |                      |                                                                                                                                                                                                                                                                                                                                                                                                              |              |
| 11 |                        |                      |                                                                                                                                                                                                                                                                                                                                                                                                              |              |
| 12 |                        |                      |                                                                                                                                                                                                                                                                                                                                                                                                              |              |
| 13 |                        |                      |                                                                                                                                                                                                                                                                                                                                                                                                              |              |
| 14 | Blinding (masking):    | <a href="#">#17b</a> | If blinded, circumstances under which unblinding is permissible, and procedure for revealing a participant's allocated intervention during the trial                                                                                                                                                                                                                                                         | N/A          |
| 15 | emergency              |                      |                                                                                                                                                                                                                                                                                                                                                                                                              |              |
| 16 | unblinding             |                      |                                                                                                                                                                                                                                                                                                                                                                                                              |              |
| 17 |                        |                      |                                                                                                                                                                                                                                                                                                                                                                                                              |              |
| 18 |                        |                      |                                                                                                                                                                                                                                                                                                                                                                                                              |              |
| 19 |                        |                      |                                                                                                                                                                                                                                                                                                                                                                                                              |              |
| 20 | Data collection plan   | <a href="#">#18a</a> | Plans for assessment and collection of outcome, baseline, and other trial data, including any related processes to promote data quality (eg, duplicate measurements, training of assessors) and a description of study instruments (eg, questionnaires, laboratory tests) along with their reliability and validity, if known. Reference to where data collection forms can be found, if not in the protocol | 10-11        |
| 21 |                        |                      |                                                                                                                                                                                                                                                                                                                                                                                                              |              |
| 22 |                        |                      |                                                                                                                                                                                                                                                                                                                                                                                                              |              |
| 23 |                        |                      |                                                                                                                                                                                                                                                                                                                                                                                                              |              |
| 24 |                        |                      |                                                                                                                                                                                                                                                                                                                                                                                                              |              |
| 25 |                        |                      |                                                                                                                                                                                                                                                                                                                                                                                                              |              |
| 26 |                        |                      |                                                                                                                                                                                                                                                                                                                                                                                                              |              |
| 27 |                        |                      |                                                                                                                                                                                                                                                                                                                                                                                                              |              |
| 28 |                        |                      |                                                                                                                                                                                                                                                                                                                                                                                                              |              |
| 29 |                        |                      |                                                                                                                                                                                                                                                                                                                                                                                                              |              |
| 30 |                        |                      |                                                                                                                                                                                                                                                                                                                                                                                                              |              |
| 31 | Data collection plan:  | <a href="#">#18b</a> | Plans to promote participant retention and complete follow-up, including list of any outcome data to be collected for participants who discontinue or deviate from intervention protocols                                                                                                                                                                                                                    | 10           |
| 32 | retention              |                      |                                                                                                                                                                                                                                                                                                                                                                                                              |              |
| 33 |                        |                      |                                                                                                                                                                                                                                                                                                                                                                                                              |              |
| 34 |                        |                      |                                                                                                                                                                                                                                                                                                                                                                                                              |              |
| 35 |                        |                      |                                                                                                                                                                                                                                                                                                                                                                                                              |              |
| 36 |                        |                      |                                                                                                                                                                                                                                                                                                                                                                                                              |              |
| 37 |                        |                      |                                                                                                                                                                                                                                                                                                                                                                                                              |              |
| 38 | Data management        | <a href="#">#19</a>  | Plans for data entry, coding, security, and storage, including any related processes to promote data quality (eg, double data entry; range checks for data values). Reference to where details of data management procedures can be found, if not in the protocol                                                                                                                                            | 7, 10-11, 13 |
| 39 |                        |                      |                                                                                                                                                                                                                                                                                                                                                                                                              |              |
| 40 |                        |                      |                                                                                                                                                                                                                                                                                                                                                                                                              |              |
| 41 |                        |                      |                                                                                                                                                                                                                                                                                                                                                                                                              |              |
| 42 |                        |                      |                                                                                                                                                                                                                                                                                                                                                                                                              |              |
| 43 |                        |                      |                                                                                                                                                                                                                                                                                                                                                                                                              |              |
| 44 |                        |                      |                                                                                                                                                                                                                                                                                                                                                                                                              |              |
| 45 |                        |                      |                                                                                                                                                                                                                                                                                                                                                                                                              |              |
| 46 | Statistics: outcomes   | <a href="#">#20a</a> | Statistical methods for analysing primary and secondary outcomes. Reference to where other details of the statistical analysis plan can be found, if not in the protocol                                                                                                                                                                                                                                     | 12           |
| 47 |                        |                      |                                                                                                                                                                                                                                                                                                                                                                                                              |              |
| 48 |                        |                      |                                                                                                                                                                                                                                                                                                                                                                                                              |              |
| 49 |                        |                      |                                                                                                                                                                                                                                                                                                                                                                                                              |              |
| 50 |                        |                      |                                                                                                                                                                                                                                                                                                                                                                                                              |              |
| 51 | Statistics: additional | <a href="#">#20b</a> | Methods for any additional analyses (eg, subgroup and adjusted analyses)                                                                                                                                                                                                                                                                                                                                     | N/A          |
| 52 | analyses               |                      |                                                                                                                                                                                                                                                                                                                                                                                                              |              |
| 53 |                        |                      |                                                                                                                                                                                                                                                                                                                                                                                                              |              |
| 54 |                        |                      |                                                                                                                                                                                                                                                                                                                                                                                                              |              |
| 55 | Statistics: analysis   | <a href="#">#20c</a> | Definition of analysis population relating to protocol non-adherence (eg, as randomised analysis), and any statistical methods to handle missing data (eg, multiple                                                                                                                                                                                                                                          | N/A          |
| 56 | population and         |                      |                                                                                                                                                                                                                                                                                                                                                                                                              |              |
| 57 | missing data           |                      |                                                                                                                                                                                                                                                                                                                                                                                                              |              |
| 58 |                        |                      |                                                                                                                                                                                                                                                                                                                                                                                                              |              |
| 59 |                        |                      |                                                                                                                                                                                                                                                                                                                                                                                                              |              |

|    |                    |                      |                                                                 |
|----|--------------------|----------------------|-----------------------------------------------------------------|
| 1  |                    | imputation)          |                                                                 |
| 2  | Data monitoring:   | <a href="#">#21a</a> | Composition of data monitoring committee (DMC);                 |
| 3  | formal committee   |                      | summary of its role and reporting structure; statement of       |
| 4  |                    |                      | whether it is independent from the sponsor and competing        |
| 5  |                    |                      | interests; and reference to where further details about its     |
| 6  |                    |                      | charter can be found, if not in the protocol. Alternatively, an |
| 7  |                    |                      | explanation of why a DMC is not needed                          |
| 8  |                    |                      |                                                                 |
| 9  |                    |                      |                                                                 |
| 10 |                    |                      |                                                                 |
| 11 |                    |                      |                                                                 |
| 12 | Data monitoring:   | <a href="#">#21b</a> | Description of any interim analyses and stopping                |
| 13 | interim analysis   |                      | guidelines, including who will have access to these interim     |
| 14 |                    |                      | results and make the final decision to terminate the trial      |
| 15 |                    |                      |                                                                 |
| 16 |                    |                      |                                                                 |
| 17 | Harms              | <a href="#">#22</a>  | Plans for collecting, assessing, reporting, and managing        |
| 18 |                    |                      | solicited and spontaneously reported adverse events and         |
| 19 |                    |                      | other unintended effects of trial interventions or trial        |
| 20 |                    |                      | conduct                                                         |
| 21 |                    |                      |                                                                 |
| 22 |                    |                      |                                                                 |
| 23 |                    |                      |                                                                 |
| 24 | Auditing           | <a href="#">#23</a>  | Frequency and procedures for auditing trial conduct, if any,    |
| 25 |                    |                      | and whether the process will be independent from                |
| 26 |                    |                      | investigators and the sponsor                                   |
| 27 |                    |                      |                                                                 |
| 28 |                    |                      |                                                                 |
| 29 |                    |                      |                                                                 |
| 30 | Research ethics    | <a href="#">#24</a>  | Plans for seeking research ethics committee / institutional     |
| 31 | approval           |                      | review board (REC / IRB) approval                               |
| 32 |                    |                      |                                                                 |
| 33 |                    |                      |                                                                 |
| 34 | Protocol           | <a href="#">#25</a>  | Plans for communicating important protocol modifications        |
| 35 | amendments         |                      | (eg, changes to eligibility criteria, outcomes, analyses) to    |
| 36 |                    |                      | relevant parties (eg, investigators, REC / IRBs, trial          |
| 37 |                    |                      | participants, trial registries, journals, regulators)           |
| 38 |                    |                      |                                                                 |
| 39 |                    |                      |                                                                 |
| 40 | Consent or assent  | <a href="#">#26a</a> | Who will obtain informed consent or assent from potential       |
| 41 |                    |                      | trial participants or authorised surrogates, and how (see       |
| 42 |                    |                      | Item 32)                                                        |
| 43 |                    |                      |                                                                 |
| 44 |                    |                      |                                                                 |
| 45 |                    |                      |                                                                 |
| 46 | Consent or assent: | <a href="#">#26b</a> | Additional consent provisions for collection and use of         |
| 47 | ancillary studies  |                      | participant data and biological specimens in ancillary          |
| 48 |                    |                      | studies, if applicable                                          |
| 49 |                    |                      |                                                                 |
| 50 |                    |                      |                                                                 |
| 51 | Confidentiality    | <a href="#">#27</a>  | How personal information about potential and enrolled           |
| 52 |                    |                      | participants will be collected, shared, and maintained in       |
| 53 |                    |                      | order to protect confidentiality before, during, and after the  |
| 54 |                    |                      | trial                                                           |
| 55 |                    |                      |                                                                 |
| 56 |                    |                      |                                                                 |
| 57 |                    |                      |                                                                 |
| 58 | Declaration of     | <a href="#">#28</a>  | Financial and other competing interests for principal           |
| 59 |                    |                      |                                                                 |
| 60 |                    |                      |                                                                 |

|    |                                             |                      |                                                                                                                                                                                                                                                                                     |          |
|----|---------------------------------------------|----------------------|-------------------------------------------------------------------------------------------------------------------------------------------------------------------------------------------------------------------------------------------------------------------------------------|----------|
| 1  | interests                                   |                      | investigators for the overall trial and each study site                                                                                                                                                                                                                             |          |
| 2  | Data access                                 | <a href="#">#29</a>  | Statement of who will have access to the final trial dataset, and disclosure of contractual agreements that limit such access for investigators                                                                                                                                     | 13       |
| 3  |                                             |                      |                                                                                                                                                                                                                                                                                     |          |
| 4  |                                             |                      |                                                                                                                                                                                                                                                                                     |          |
| 5  |                                             |                      |                                                                                                                                                                                                                                                                                     |          |
| 6  |                                             |                      |                                                                                                                                                                                                                                                                                     |          |
| 7  | Ancillary and post trial care               | <a href="#">#30</a>  | Provisions, if any, for ancillary and post-trial care, and for compensation to those who suffer harm from trial participation                                                                                                                                                       | N/A      |
| 8  |                                             |                      |                                                                                                                                                                                                                                                                                     |          |
| 9  |                                             |                      |                                                                                                                                                                                                                                                                                     |          |
| 10 |                                             |                      |                                                                                                                                                                                                                                                                                     |          |
| 11 |                                             |                      |                                                                                                                                                                                                                                                                                     |          |
| 12 |                                             |                      |                                                                                                                                                                                                                                                                                     |          |
| 13 | Dissemination policy: trial results         | <a href="#">#31a</a> | Plans for investigators and sponsor to communicate trial results to participants, healthcare professionals, the public, and other relevant groups (eg, via publication, reporting in results databases, or other data sharing arrangements), including any publication restrictions | 13       |
| 14 |                                             |                      |                                                                                                                                                                                                                                                                                     |          |
| 15 |                                             |                      |                                                                                                                                                                                                                                                                                     |          |
| 16 |                                             |                      |                                                                                                                                                                                                                                                                                     |          |
| 17 |                                             |                      |                                                                                                                                                                                                                                                                                     |          |
| 18 |                                             |                      |                                                                                                                                                                                                                                                                                     |          |
| 19 |                                             |                      |                                                                                                                                                                                                                                                                                     |          |
| 20 |                                             |                      |                                                                                                                                                                                                                                                                                     |          |
| 21 | Dissemination policy: authorship            | <a href="#">#31b</a> | Authorship eligibility guidelines and any intended use of professional writers                                                                                                                                                                                                      | 14       |
| 22 |                                             |                      |                                                                                                                                                                                                                                                                                     |          |
| 23 |                                             |                      |                                                                                                                                                                                                                                                                                     |          |
| 24 |                                             |                      |                                                                                                                                                                                                                                                                                     |          |
| 25 | Dissemination policy: reproducible research | <a href="#">#31c</a> | Plans, if any, for granting public access to the full protocol, participant-level dataset, and statistical code                                                                                                                                                                     | 13       |
| 26 |                                             |                      |                                                                                                                                                                                                                                                                                     |          |
| 27 |                                             |                      |                                                                                                                                                                                                                                                                                     |          |
| 28 |                                             |                      |                                                                                                                                                                                                                                                                                     |          |
| 29 |                                             |                      |                                                                                                                                                                                                                                                                                     |          |
| 30 | Informed consent materials                  | <a href="#">#32</a>  | Model consent form and other related documentation given to participants and authorised surrogates                                                                                                                                                                                  | Appendix |
| 31 |                                             |                      |                                                                                                                                                                                                                                                                                     |          |
| 32 |                                             |                      |                                                                                                                                                                                                                                                                                     |          |
| 33 |                                             |                      |                                                                                                                                                                                                                                                                                     |          |
| 34 | Biological specimens                        | <a href="#">#33</a>  | Plans for collection, laboratory evaluation, and storage of biological specimens for genetic or molecular analysis in the current trial and for future use in ancillary studies, if applicable                                                                                      | N/A      |
| 35 |                                             |                      |                                                                                                                                                                                                                                                                                     |          |
| 36 |                                             |                      |                                                                                                                                                                                                                                                                                     |          |
| 37 |                                             |                      |                                                                                                                                                                                                                                                                                     |          |
| 38 |                                             |                      |                                                                                                                                                                                                                                                                                     |          |
| 39 |                                             |                      |                                                                                                                                                                                                                                                                                     |          |
| 40 |                                             |                      |                                                                                                                                                                                                                                                                                     |          |

41 The SPIRIT checklist is distributed under the terms of the Creative Commons Attribution License CC-  
 42 BY-ND 3.0. This checklist can be completed online using <https://www.goodreports.org/>, a tool made  
 43 by the [EQUATOR Network](#) in collaboration with [Penelope.ai](#)  
 44  
 45  
 46  
 47  
 48  
 49  
 50  
 51  
 52  
 53  
 54  
 55  
 56  
 57  
 58  
 59  
 60

# BMJ Open

## Text messaging support for patients with diabetes or coronary artery disease (SupportMe): Protocol for a pragmatic randomised controlled trial

|                                 |                                                                                                                                                                                                                                                                                                                                                                                                                                                                                                                                                                                            |
|---------------------------------|--------------------------------------------------------------------------------------------------------------------------------------------------------------------------------------------------------------------------------------------------------------------------------------------------------------------------------------------------------------------------------------------------------------------------------------------------------------------------------------------------------------------------------------------------------------------------------------------|
| Journal:                        | <i>BMJ Open</i>                                                                                                                                                                                                                                                                                                                                                                                                                                                                                                                                                                            |
| Manuscript ID                   | bmjopen-2018-025923.R1                                                                                                                                                                                                                                                                                                                                                                                                                                                                                                                                                                     |
| Article Type:                   | Protocol                                                                                                                                                                                                                                                                                                                                                                                                                                                                                                                                                                                   |
| Date Submitted by the Author:   | 06-Mar-2019                                                                                                                                                                                                                                                                                                                                                                                                                                                                                                                                                                                |
| Complete List of Authors:       | Cheung, N Wah; University of Sydney, Redfern, Julie; University of Sydney, Westmead Clinical School Thiagalingam, Aravinda; University of Sydney, Sydney, Australia, Sydney Medical School, ; Westmead Hospital, 3. Cardiology Department Hng, Tien-Ming; Blacktown Mount Druitt Hospital, Diabetes & Endocrinology Shariful Islam, Sheikh Mohammed; The George Institute for Global Health Haider, Rabbia; University of Sydney, Diabetes & Endocrinology Faruque, Sonia; Westmead Hospital, Diabetes & Endocrinology Chow, Clara; University of Sydney, Westmead Applied Research Centre |
| <b>Primary Subject Heading</b>: | Diabetes and endocrinology                                                                                                                                                                                                                                                                                                                                                                                                                                                                                                                                                                 |
| Secondary Subject Heading:      | Cardiovascular medicine                                                                                                                                                                                                                                                                                                                                                                                                                                                                                                                                                                    |
| Keywords:                       | General diabetes < DIABETES & ENDOCRINOLOGY, Coronary heart disease < CARDIOLOGY, Clinical trials < THERAPEUTICS, Telemedicine < BIOTECHNOLOGY & BIOINFORMATICS                                                                                                                                                                                                                                                                                                                                                                                                                            |
|                                 |                                                                                                                                                                                                                                                                                                                                                                                                                                                                                                                                                                                            |

SCHOLARONE™  
Manuscripts

1  
2  
3  
4  
5 **Text messaging support for patients with diabetes or coronary artery disease**  
6  
7 **(SupportMe): Protocol for a pragmatic randomised controlled trial**  
8  
9

10 N Wah Cheung<sup>1,2,3</sup>

11 Email: wah.cheung@sydney.edu.au  
12  
13

14 Julie Redfern<sup>2,3</sup>

15 Email: julie.redfern@sydney.edu.au  
16  
17

18 Aravinda Thiagalingam<sup>1,2,3</sup>

19 Email: aravinda.thiagalingam@sydney.edu.au  
20  
21

22 Tien-Ming Hng<sup>4</sup>

23 Email: tien-ming.Hng@health.nsw.gov.au  
24  
25

26 Sheikh Mohammed Shariful Islam<sup>2</sup>

27 Email: SIslam@georgeinstitute.org.au  
28  
29

30 Rabbia Haider<sup>1,3</sup>

31 Email: Rabbia.Haider@health.nsw.gov.au  
32  
33

34 Sonia Faruque<sup>1,3</sup>

35 Email: Sonia.Faruque@health.nsw.gov.au  
36  
37

38 Clara K Chow<sup>1,2,3</sup>

39 Email: clara.chow@sydney.edu.au  
40  
41

42 On behalf of the SupportMe investigators  
43  
44

45 <sup>1</sup>Westmead Hospital, Sydney, Australia  
46  
47

48 <sup>2</sup>The George Institute for Global Health, Sydney, Australia  
49  
50

51 <sup>3</sup> University of Sydney, Faculty of Medicine and Health, Westmead Applied Research Centre,  
52 Westmead Clinical School  
53

54 <sup>4</sup>Blacktown Hospital, Sydney, Australia  
55  
56  
57  
58  
59  
60

**Corresponding Author**

N Wah Cheung

Dept of Diabetes & Endocrinology

Westmead Hospital

Westmead NSW 2145

Australia

Email: [wah.cheung@sydney.edu.au](mailto:wah.cheung@sydney.edu.au)

Telephone: 612 88906796

**The SupportMe Investigators**

David Burgess, Bridie Carr, N Wah Cheung, Jin Gun Cho, Clara K Chow, Michael Crampton, Sonia Faruque, Cate Ferry, Rabbia Haider, Alison Hayes, Tien-Ming Hng, Sheikh Mohammed Shariful Islam, Stephen Leeder, Simon Raadsma, Julie Redfern, Chris Rissel, Aravinda Thiagalingam



## ABSTRACT

### Introduction

Low-cost interventions providing self-management support are needed for people with coronary artery disease (CAD) and diabetes. Mobile phone text messaging provides a potential vehicle for this. The SupportMe Trial aims to assess the feasibility of embedding a text-messaging program into routine clinical practice, and will determine if this improves cardiovascular risk factor and diabetes control amongst patients with CAD or type 2 diabetes.

### Methods and Analysis

SupportMe is a randomised controlled trial to be conducted within the framework of a health district-wide integrated care program for people with CAD or T2DM. One thousand subjects will be recruited, with at least 500 in each group. Intervention subjects will receive 4 text messages a week for 6 months which provide advice, motivation, information and support for disease management and healthy behaviour. The primary outcome is systolic blood pressure at 6 months. Secondary outcomes include body mass index, waist circumference, low-density lipoprotein cholesterol, physical activity levels, dietary intake, quality of life, mood and smoking cessation, and for subjects with diabetes, glycosylated haemoglobin and fasting serum glucose. A process and economic evaluation will also be conducted.

### Ethics and Dissemination

The study has been approved by the Western Sydney Local Health District Human Research Ethics Committee (AU RED HREC/16/WMEAD/331). Results will be disseminated via the scientific forums including peer-reviewed publications and presentations at national and international conferences.

### Clinical Trials Registration

ACTRN12616001689460.

## Trial Commencement and Completion

Commencement: March 2017

Anticipated completion: June 2019

Current protocol V4.0, December 2017.

## Keywords

Randomised controlled trial, type 2 diabetes, coronary artery disease, text messaging

## Word Count

3998

## ARTICLE SUMMARY

### Strengths and Limitations of this Study

- This trial investigates the feasibility of incorporating a text-messaging intervention into routine clinical care across an entire health district.
- This study tests the effectiveness of a single text-messaging program which can be customised for people with more than one chronic disease.
- This trial will be the largest study examining the effectiveness of text messaging support for people with type 2 diabetes.
- The text messages will be provided in English only.
- The study outcomes relate mainly to cardiovascular risk and diabetes control, and not hard clinical outcomes such as major cardiovascular events.

## INTRODUCTION

Non-communicable diseases (NCDs) are the leading cause of death globally, accounting for 40 million, or 70% of the total deaths globally in 2015, rising by 14% since 2005<sup>1</sup>.

Cardiovascular disease (CVD) accounts for almost half of the NCD deaths. Diabetes caused 4% of the NCD deaths, but its impact is growing rapidly, up by 32% since 2005<sup>1</sup>. The International Diabetes Federation estimated the prevalence of diabetes worldwide was 8.3% in 2014, and projected to increase to 9.9% by 2030, to affect more than 500 million people<sup>2</sup>.

The major modifiable determinants of CVD are tobacco smoking, and the related risk factors of physical inactivity, unhealthy diet, hypertension, hypercholesterolaemia, and diabetes<sup>3</sup>. The incidence of CVD can be reduced by treatments and strategies which address these risk factors<sup>3,4</sup>. Early glucose and blood pressure control amongst people with type 2 diabetes may reduce mortality and diabetes complications<sup>5,6</sup>. Despite substantial evidence of clinical benefits, existing interventions are under-utilized and poor adherence to exercise, diet and smoking cessation are problematic<sup>7</sup>. Hypertension is one risk factor common to both people with CVD and type 2 diabetes that is often inadequately managed. We have previously shown that without support, blood pressure control deteriorates amongst patients with coronary artery disease following discharge from hospital cardiac services<sup>8</sup>. Even patients with diabetes who attend specialist practices often have elevated blood pressure and fail to meet guideline targets<sup>9,10</sup>.

Information and communication technologies have great potential for the delivery of preventative and educational healthcare programs at a large scale and at low cost<sup>11</sup>. A systematic review reported that such technology used in the detection and follow up of CVD provided better clinical outcomes, mortality reduction and lower health services utilization<sup>12</sup>. Systematic reviews have also found that text-message interventions almost double the likelihood of short-term smoking cessation<sup>13</sup> and medication adherence<sup>14</sup>, and have provided some evidence of modest effects on weight loss<sup>15,16</sup>, hypertension<sup>16</sup> and physical activity<sup>16,17</sup>. Previous trials of text messaging for people with diabetes have

1  
2  
3 generally been small but show promise for the improvement of glycaemic parameters<sup>16,18-20</sup>.  
4  
5 However apart from smoking cessation, these programs have not been widely implemented  
6  
7 or translated into routine healthcare for patients. Moreover, previous trials have generally  
8  
9 focused on single diseases or conditions.

10  
11  
12 The Tobacco, Exercise and Diet Messages (TEXT ME) study of 710 patients with coronary  
13  
14 heart disease (CHD) was the first randomised controlled trial which demonstrated that a  
15  
16 text messaging program providing motivation, support and education improved multiple  
17  
18 clinical risk factor measures including LDL-cholesterol, blood pressure, body mass index  
19  
20 (BMI), physical activity and smoking cessation<sup>8</sup>. As part of our long-term goal of developing a  
21  
22 text messaging program for people with different or multiple chronic diseases, we have  
23  
24 adapted the TEXT ME intervention to undertake a text messaging support program for  
25  
26 people with 2 different chronic diseases, namely type 2 diabetes or coronary artery disease  
27  
28 (CAD), or both. The intervention will provide education, clinical management support and  
29  
30 healthy lifestyle motivation, with the aim of improving cardiovascular risk factors, in  
31  
32 particular blood pressure, and diabetes care.

33  
34 Widespread delivery of text-message based education and support programs requires the  
35  
36 intervention to be embedded into routine clinical care for people with chronic disease. This  
37  
38 paper describes the protocol for the SupportMe randomised controlled trial. A major goal of  
39  
40 SupportMe was to identify and address key questions in the implementation of text-  
41  
42 message based education and support program into our existing health systems. Our test  
43  
44 bed was the Western Sydney Local Health District (WSLHD) which serves a population of  
45  
46 ~970,000 in Western Sydney, Australia.

## 51 **METHODS AND ANALYSIS**

### 56 **Study Design, Setting and Population**

57  
58 SupportMe is a pragmatic randomised clinical trial of 1000 patients with CAD and/or type 2  
59  
60 diabetes (Fig 1). The study will be conducted in the ethnically and culturally diverse WSLHD.

1  
2  
3 Participants will be recruited via referrals from the community and hospital setting. We will  
4 leverage the framework of the Western Sydney Integrated Care Program (WSICP)<sup>21</sup> which  
5 involves over 200 general practitioners and 50 hospital clinicians to encourage referral to  
6 the SupportMe program. The WSICP seeks to improve health outcomes for patients with  
7 chronic disease and improve the continuity of care across hospital and primary care services  
8 across the health district.  
9  
10  
11  
12  
13  
14

15  
16 The program will be advertised to hospital clinicians via internal hospital communication  
17 pathways and to general practitioners (GPs) through the Western Sydney Primary Health  
18 Network (which supports GPs). We will provide a variety of referral options including  
19 traditional letter-based referrals, fax, phone, email, SMS as well as e-referral through an  
20 internet portal.  
21  
22  
23  
24  
25

26  
27 To be eligible, subjects need to be 18 years or older, with i) CAD, defined as history of prior  
28 myocardial infarction or documented >50% occlusion of a major coronary artery on  
29 coronary angiography, and/or ii) type 2 diabetes, with an HbA1c in the last 6 months of  
30 7.1%-11.4% (54-101 mmol/mol). Subjects need to own a mobile phone and be able to read  
31 text messages in English. We will allocate each referred patient with a screening ID number  
32 and maintain a "screening log" of referred subjects, which records basic demographic data,  
33 as well as the referral source. We will also record reasons for ineligibility and non-  
34 participation. Research assistants will assess the eligibility of subjects referred subjects,  
35 explain details of the study, and obtain consent from those who wish to proceed into the  
36 study. For subjects who enter the SupportMe trial, we will keep an "enrolment log" and we  
37 will notify their referring clinician and their GP (if this was not the referrer).  
38  
39  
40  
41  
42  
43  
44  
45  
46  
47  
48  
49  
50

### 51 **Randomisation**

52 Randomisation will be in a uniform allocation of 1:1, stratified by health condition (CHD,  
53 Diabetes or both), and performed through an electronic platform. Personnel collecting  
54 baseline data will be blinded to treatment allocation. The computerised platform will  
55 connect with the text messaging platform to commence sending messages to the  
56 intervention subjects automatically based on randomisation. To minimise un-blinding at  
57  
58  
59  
60

1  
2  
3 follow-up, participants will be sent a message reminding them not to reveal treatment  
4 allocation to follow-up data collectors.  
5  
6  
7

8  
9 The secure web-based Research Electronic Data Capture (REDCap) web application will be  
10 used for participant registration and data collection. Each subject in the study will be  
11 assigned a unique study identification number in REDCap, and their name, initials, date of  
12 birth and contact details will not be recorded to ensure that the dataset is de-identified.  
13  
14  
15  
16

### 17 18 **Intervention and Control** 19

20  
21 The SupportMe intervention is a simple patient-centred intervention designed to provide  
22 semi-personalised and customised support in clinical and lifestyle management, as an  
23 adjunct to standard care provided by the subjects' usual healthcare professionals.  
24

25 Participants allocated to intervention will receive four text messages per week sent at  
26 random times between 9am and 5 pm during weekdays, over a 6 month period. These will  
27 be unidirectional, in that subjects will be sent messages but be advised that there is no  
28 expectation that they respond back nor is there a facility to interact with or discuss their  
29 specific health issues with the study team. However, a researcher will monitor messages  
30 sent from participants, and a record of these will be maintained. Where there are return  
31 messages which are a potential cause for clinical concern, the message will be escalated to a  
32 doctor for review. This researcher will not participate in any other data collection or  
33 individual level of analysis.  
34  
35  
36  
37  
38  
39  
40  
41  
42  
43

44 Control subjects will only receive a welcome message at the initiation of their participation  
45 in the trial, and a message at 6 months reminding them of their follow-up appointment. It is  
46 expected that both intervention and control participants will continue receiving usual care  
47 from their regular health professionals.  
48  
49  
50  
51

52  
53 All participants will be offered brief training at enrolment on how to read a text message  
54 and how to delete or save messages. Participants may withdraw from the study at any time  
55 via text message; in which case a team member will contact the participant for confirmation  
56 and delivery of text messages to these subjects will be deactivated.  
57  
58  
59  
60

1  
2  
3  
4  
5 At the end of the 6 month program, maintenance messages will be sent to intervention  
6 subjects for a further 6 months at a frequency of 2 per week. Control subjects will be  
7 offered the opportunity to receive the SupportMe intervention at that point.  
8  
9

### 10 11 12 13 **SupportMe Message Content** 14

15 The text message content and program structure was developed according to our previously  
16 published process<sup>22</sup>. The text messages provide advice, motivation, information and support  
17 for disease management, monitoring of risk factors, and tips and links to engage in healthy  
18 behaviours. Each of the 4 messages the intervention subjects receive each week will focus  
19 on a different aspect of healthcare, namely (1) general health, (2) nutrition, (3) physical  
20 activity, (4) disease self-management. A different set of 4 message banks was developed for  
21 each of the 3 strata in the study; CAD, diabetes, and CAD with diabetes, though there are a  
22 number of messages common to the 3 strata. In addition, there are subsets of messages  
23 which enable a degree of customisation. These are smoker and non-smoker, insulin user and  
24 non-insulin user, vegetarian and non-vegetarian. Messages from each bank will be sent in a  
25 random order until 26 weeks has passed.  
26  
27  
28  
29  
30  
31  
32  
33  
34  
35

36  
37 Existing validated messages which were used in the TEXT ME trial were reviewed for use in  
38 SupportMe. Additional SupportMe messages, mainly related to diabetes, were developed by  
39 a working group including endocrinologists, diabetes educators, dietitians, podiatrists, and  
40 clinicians in primary care, community health, population health, existing health promotion  
41 programs and consumers. The process followed was similar to that applied to the TEXT ME  
42 program<sup>22,23</sup>, whereby the working group initially developed the text messages, then these  
43 were reviewed for readability and to ensure messages were presented with a positive focus.  
44 The text messages were modified based on feedback from the diabetes working group, and  
45 then underwent user testing with feedback and further modification. Examples of final text  
46 messages include: *"Did you exercise today?"*, *"Has your Dr checked & discussed your*  
47 *cholesterol levels with you recently? These need regular review"*, *"Healthy eating means at*  
48 *least 5 serves of vegetables & 2 serves of fruit every day"*, *"If your sugars are regularly under*  
49  
50  
51  
52  
53  
54  
55  
56  
57  
58  
59  
60

1  
2  
3 *4mmol/L or over 10mmol/L, it may be time to review your diabetes treatment - speak to*  
4 *your Doctor”.*  
5  
6  
7

8  
9 Our TEXT ME message management engine will deliver the messages for SupportMe. It  
10 selects messages from message banks as per prespecified algorithms using patient baseline  
11 data entered into the message management system. The engine sends messages through a  
12 telecommunications gateway to enable them to be sent to all participants on any Australian  
13 phone network at no cost to the participant and at a bulk-rate cost to the study.  
14  
15  
16  
17

### 18 19 20 **Study Outcomes**

21 The primary outcome of the study is systolic blood pressure (sBP) after 6 months. This will  
22 be measured by a digital sphygmomanometer, three times in the sitting position, with the  
23 mean of the last 2 readings being recorded. Secondary outcomes include body mass index,  
24 waist circumference, fasting low-density lipoprotein cholesterol, physical activity (measured  
25 by the Global Physical Activity Questionnaire<sup>24</sup>), quality of life (measured by the 12 item  
26 short form (SF-12) health survey<sup>25</sup>), depression (measured by the Patient Health  
27 Questionnaire-9 depression scale<sup>26</sup>) and dietary intake (measured by the dietary component  
28 of the WHO STEPS instrument<sup>27</sup>), smoking cessation and medication use. Subjects with  
29 diabetes will also be evaluated for the additional secondary outcomes of HbA1c and fasting  
30 serum glucose. A composite outcome of guideline levels of risk factors achieved will also be  
31 analysed. Surveys and measurements will be conducted in face-to-face visits with research  
32 assistants who will be blinded to the subject’s treatment allocation.  
33  
34  
35  
36  
37  
38  
39  
40  
41  
42  
43

44  
45 The protocol requires the closing study visit to be undertaken within one month of the 6  
46 month time point. Study visits performed more than one month later will be regarded as  
47 protocol deviations, but nonetheless we will endeavour to capture the outcome data.  
48  
49  
50  
51

### 52 **Process Measures**

53 Process data will be collected from referral information, participant surveys, focus groups  
54 and analytical information. The screening log will collect information regarding the source of  
55 referrals to SupportMe, to enable an assessment of its integration into the WSICP and level  
56 of clinician engagement. The screening log will also provide data for reasons that subjects  
57  
58  
59  
60



1  
2  
3 were not enrolled into the SupportMe program. Analytical data extracted from the message  
4 software system will provide information about the time that messages are sent and the  
5 proportion of text messages successfully delivered (eg, if mobile phone mail boxes are full)  
6 will be recorded. A log will be kept of non-protocol participant contact with the study team,  
7 the reason for contact and the method used for contact (eg, by telephone, email).  
8  
9  
10  
11  
12  
13

14 SupportMe participants allocated to the intervention group will be administered a User  
15 Survey at the 6-month follow-up assessment. This questionnaire explores the acceptability  
16 of the text messages, identification of which messages participants remembered, liked or  
17 disliked, what they did with messages (eg, kept them or deleted them immediately), their  
18 perceived utility of the text messages and their opinion regarding the intrusiveness, timing,  
19 language and content suitability of the text messages. To obtain a more in-depth  
20 understanding of the potential barriers and facilitators for integration into existing health  
21 services and individual level to uptake of this program, we will also conduct purposive semi-  
22 structured interviews with a subsample of participants in the intervention group. Sampling  
23 will continue until thematic saturation occurs. We anticipate from previous experience the  
24 need to conduct approximately 20 patient interviews. Our research group has extensive  
25 experience conducting such evaluations alongside RCTs.  
26  
27  
28  
29  
30  
31  
32  
33  
34  
35  
36  
37  
38  
39  
40

### 41 **Economic Evaluation**

42 We will conduct a cost-effectiveness and cost-utility analysis of SupportMe from a health  
43 sector perspective. The costs and health outcomes associated with the intervention will be  
44 compared in an incremental cost-effectiveness analysis. Direct health care costs will be  
45 determined by patient-level data linkage to the Medical Benefits Schedule (MBS) and  
46 Pharmaceutical Benefits Scheme (PBS). The MBS and PBS are government funded schemes  
47 which provide subsidies for non-hospital attendances to healthcare providers (eg: general  
48 practitioners, specialists and some allied health providers such as dietitians), and for  
49 pharmaceutical agents respectively. Cost of hospitalisations will be determined from  
50 hospital admission records. We will use the SF-12 to determine Quality Adjusted Life Years  
51 (QALYs) in a trial based cost-utility analysis. Observed changes in clinical risk factors e.g. LDL-  
52 cholesterol will inform longer term modelling of serious events and hospitalisations over a  
53  
54  
55  
56  
57  
58  
59  
60

1  
2  
3 lifetime and thus estimate longer term costs, and cost-effectiveness of the intervention. For  
4 type 2 diabetes, patient-level risk factors will include measures of HbA1c which will be used  
5 in a validated health economic model. The per patient costs of intervention delivery will be  
6 used to estimate total costs of scaling up the SupportMe program at a state or national  
7 level.  
8  
9  
10  
11  
12

### 13 14 **Serious Adverse Events**

15 We will record serious adverse events (SAEs) which are fatal, life-threatening, medically  
16 important, result in hospitalisation or prolongation of hospitalisation, or cause disability or  
17 incapacity. The Clinical Endpoint Adjudication Coordinator will determine whether the event  
18 will need adjudication. SAEs related to diabetes or cardiac disease will be adjudicated by an  
19 independent physician.  
20  
21  
22  
23  
24  
25

### 26 27 **Statistical analyses**

28 We plan to recruit 1000 subjects into the study, with at least 500 patients with each of  
29 diabetes or CHD. A sample of 1000 subjects will enable detection of a 3.5 mmHg difference  
30 in sBP with 90% power and no loss to follow up (Type 1 error 5%, 2 sided alpha and  
31 assuming a conservative standard deviation (SD) of 17) and 80% power if there was  
32 approximately 20% loss to follow-up. If the SD of 12mmHg from our earlier TEXT ME study<sup>8</sup>  
33 was applied, a sample size of 720 subjects has 90% power to detect a difference of 2.5  
34 mmHg with no loss to follow-up, but with 20% loss to follow-up, 900 subjects would be  
35 required. Within the strata of diabetes or CHD, a sample size of 500 and accounting for 20%  
36 loss to follow-up, would have 80% power to detect a 5 mmHg difference in sBP (SD 17  
37 mmHg) and 80% power to detect a 3.5 mmHg difference assuming a SD of 12 mmHg. Data  
38 from the Blood Pressure Lowering Treatment Trialist's Collaboration indicate that a  
39 reduction in BP of 5 mmHg reduces the risk of major cardiovascular events, irrespective of  
40 the form of pharmacotherapy<sup>28</sup>. We also planned for an adequate sample size to  
41 demonstrate an improvement in diabetes control, as measured by HbA1c. Applying local  
42 data regarding the distribution of HbA1c<sup>9</sup>, a sample size of 500 without loss to follow-up is  
43 required for 80% power to detect a difference of 0.3% in HbA1c in the diabetes cohort  
44  
45  
46  
47  
48  
49  
50  
51  
52  
53  
54  
55  
56  
57  
58  
59  
60

1  
2  
3 (SD=1.2), but if allowing for 20% drop-out, the required sample size increases to 625. This  
4 quantum of HbA1c reduction translates to a 6% reduction in risk of diabetes  
5 complications<sup>29</sup>. As we expect >20% of CHD patients to also have diabetes, there will be at  
6  
7 least 600 patients with diabetes in the total 1000 subject cohort.  
8  
9

10  
11  
12 The study will follow intention-to-treat principles for analyses. Participants will be analysed  
13 at 6 months by original assigned groups. The primary analysis will use analysis of covariance  
14 (ANCOVA) adjusting for baseline sBP. To explore the treatment effect by prespecified risk  
15 factors, namely baseline high/low BP, BMI groupings, high/normal LDL-cholesterol,  
16 high/normal HbA1c, whether they had background BP lowering therapy, ethnicity group,  
17 age groups, gender, participation in WSICP and medical conditions, a model of 6 month sBP  
18 will be performed adjusting for baseline sBP, treatment, risk factors and the interaction of  
19 each risk factor with treatment. The modelled mean differences with 95% confidence  
20 intervals for each risk factor will be presented in a forest plot together with tests of  
21 interaction to assess whether the treatment effect varies between levels of each risk factor.  
22  
23  
24  
25  
26  
27  
28  
29  
30  
31

32 The pattern of missing data for the primary and subgroup analysis will be explored to assess  
33 if some baseline characteristics predict missing sBP or HbA1c at 6 months using a log  
34 binomial regression analysis. The study will be reported following CONSORT2010  
35 guidelines<sup>30</sup>.  
36  
37  
38  
39  
40  
41  
42  
43  
44

#### 45 **Patient and Public Involvement**

46 Diabetes NSW & ACT, the peak consumer diabetes organisation in the state of New South  
47 Wales, participated in the development of the text messages. The text messages relating to  
48 coronary artery disease had previously been tested and assessed for acceptability in the  
49 TEXT ME trial<sup>8</sup>. Ten patients with diabetes were surveyed prior to the study to obtain  
50 feedback regarding the draft new diabetes related text messages. This feedback was  
51 considered and messages modified or discarded accordingly.  
52  
53  
54  
55  
56  
57  
58  
59  
60

## ETHICS, GOVERNANCE AND DISSEMINATION

The study has been approved by the Western Sydney Local Health District Human Research Ethics Committee. The study will adhere to the National Health and Medical Research Council ethical guidelines for human research. Written and informed consent will be obtained from all participants. The trial has been registered with the Australian New Zealand Clinical Trials Registry, ACTRN12616001689460. This includes all items from the World Health Organization Trial Registration Set.

The study will be administered by the George Institute and the University of Sydney, with the design and conduct overseen by a project management committee. This committee has expertise in large-scale clinical trials and qualitative research, economic analysis, clinical CVD and diabetes management and healthy policy implementation at both a local and national level. It includes investigators and partners in the program. The program will also report to the WSICP Steering Committee.

A data monitoring safety board comprising a clinician with expertise in diabetes, and a second with expertise in cardiology will evaluate all serious adverse events. A manual of procedures has been developed, outlining study procedures including definitions, study organisational structure, quality control, procedures for collection and recording of data, monitoring and audit of the study, procedures for patient withdrawal, non-compliance and protocol violations.

Only the chief investigators (NWC, JR, AT, TMH, CKC) and trial statistician will have access to the final de-identified dataset. The full protocols and de-identified dataset will be made available from the investigators on reasonable request, and subject to ethics approvals. The findings of this study will be disseminated via the usual scientific forums, including peer-reviewed publications and presentations at national and international conferences. Authorship will be based on the International Committee of Journal Editors guidelines. We have followed the SPIRIT reporting guidelines<sup>31</sup>.

## CONCLUSION

SupportMe will develop new evidence as to whether a single text messaging support program will improve clinical parameters for people with different chronic diseases, namely cardiovascular disease and diabetes, and whether this can be successfully implemented into a wider chronic disease program. The project will also provide an economic analysis and understanding of cost as well as barriers and enablers associated with implementation and patient satisfaction.

Information technology and communication are considered key enablers of successful integrated care programs<sup>32</sup>. However, this has largely focused on the use of information systems and communication between healthcare providers, rather than between the healthcare program and the patient. The mobile phone is increasingly being recognised as a simple everyday technology which can be used to provide information and self-management support directly to patients. Simple texting programs administered by computerised message management systems make them affordable, scalable and practical to deliver as an adjunct to our existing health services. There are already data that text-messaging can effectively improve clinical outcomes or parameters by supporting people with chronic diseases and conditions such as CVD, asthma, smoking and medication adherence<sup>12,33</sup>. Previous data for diabetes has been mixed, and based on small trials, but a recent large randomised controlled trial has shown that a comprehensive text-messaging based diabetes support program significantly reduced HbA1c<sup>34</sup>.

The challenge now is to develop and test text-messaging interventions which are adaptable to people with different or multiple chronic diseases, and to implement these as a part of routine care. Indeed, with the high prevalence of chronic diseases, large scale population health interventions are required. The low cost of text-messaging systems without the need for routine input from a health professional, makes them ideally suited for this purpose. In Australia, 50% of the population has at least one of eight chronic diseases, and half of these people have at least two such conditions<sup>35</sup>. Cardiovascular disease is the disease group

1  
2  
3 responsible for the highest expenditure<sup>35</sup>. With a high prevalence of chronic disease, and  
4 many people having multiple diseases, it is impractical for a patient to enrol in a separate  
5 text-messaging program for each of their chronic conditions, or for busy clinicians to  
6 manage the complexity of referring their patients to different text-messaging programs.  
7  
8 SupportMe tests the effectiveness of an intervention for people with either CVD or diabetes,  
9  
10 or both disorders, and paves the way for a multifaceted text-messaging support program to  
11 be developed. A single text-messaging system, which includes multiple customised modules  
12 for people with other prevalent chronic diseases such as chronic obstructive pulmonary  
13 disease, chronic kidney disease, and mental health disorders, as well as any combination of  
14 these disorders would be highly desirable.  
15  
16  
17  
18  
19  
20  
21  
22

23 For these individuals, better preventative care and fostering of self-management will  
24 decrease the need for access to tertiary services and hospitalisation. Provision of text-  
25 message programs at the point of hospital or community health engagement will enable the  
26 health service to support larger numbers of patients at a low-cost, enhance patient  
27 involvement with their care and their perception of the health service supporting them.  
28  
29  
30  
31  
32  
33

34 A limitation of our program is that messages will be delivered in English only, and in a  
35 multicultural society such as Australia, we need to overcome language barriers to  
36 healthcare. We intend to develop messages in other languages for future text-messaging  
37 programs we plan to undertake. However, this is not a process of simple translation, as the  
38 messages need to be culturally and linguistically appropriate for each individual language  
39 group, and undergo a rigorous process of testing<sup>36</sup>.  
40  
41  
42  
43  
44  
45  
46

47 In summary, by conducting SupportMe within the framework of the WSICP, and  
48 encouraging referrals from clinicians involved in the clinical services offered by the WSICP,  
49 we will be testing if a text-messaging program can be successfully implemented as standard  
50 care for patients in a chronic disease integrated care program which runs across a large  
51 health district, and improve clinical outcomes. Ultimately, for a mobile health initiative to be  
52 successful beyond the life of a clinical trial, it has to be a part of standard care. This requires  
53 support from fund-holders in health services, to support it as part of a larger program,  
54 rather than being a stand-alone intervention.  
55  
56  
57  
58  
59  
60

### Author contributions

CKC, NWC, SMSI, JR, and AT conceived the original study concept. All authors (CKC, NWC, SMSI, JR, AT, TMH, RH, SF) contributed to the design of the study, protocol development, its implementation, and drafting of the manuscript.

### Funding statement

This study is funded by the Translational Research Grants Scheme of NSW Health. JR is funded by a NHMRC Career Development Fellowship [APP1143538]. CKC is funded by a Career Development Fellowship co-funded by the NHMRC and National Heart Foundation [APP1105447]. SMSI is funded by The George Institute for Global Health Post Doctorate Research Fellowship and has received funding from High Blood Pressure Research Foundation of Australia. RH is funded by a Westmead Hospital Jerry Koutts Scholarship.

### Competing Interests

None

### Acknowledgements

This study is supported by the Western Sydney Local Health District, Heart Foundation, New South Wales Agency for Clinical Innovation, Diabetes NSW, the University of Sydney, and the George Institute. Diabetes NSW & ACT has supported and promoted the study, as well as participated in message development. We thank Caroline Wu and Tony Barry for setting up the Redcap database and SMS engine, project manager Sandra Bahamad, study statistician Simone Marschner and research assistants Lily Chen, Daniel McIntyre, Gilly Rosic and Shelley She.

## References

1. GBD 2015 Mortality and Causes of Death Collaborators. Global, regional, and national life expectancy, all-cause mortality, and cause-specific mortality for 249 causes of death, 1980-2015: a systematic analysis for the Global Burden of Disease Study 2015. *Lancet* 2016; 388: 1459-1544.
2. Whiting DR, Guariguata L, Weil C, Shaw J. IDF diabetes atlas: Global estimates of the prevalence of diabetes for 2011 and 2030. *Diabetes Res Clin Pract* 2011; 94: 311-321.
3. World Health Organization. Global status report on noncommunicable diseases 2014. WHO: Geneva, 2016.
4. Clark AM, Harlting L, Vandermeer B, McAlister FA. Meta-analysis: secondary prevention programs for patients with coronary artery disease. *Ann Intern Med* 2005; 143: 659-672.
5. UKPDS. Intensive blood-glucose control with sulphonylureas or insulin compared with conventional treatment and risk of complications in patients with type 2 diabetes (UKPDS 33). *Lancet* 1998; 352: 837-853.
6. Holman RR, Sanjoy KP, Bethel MA, Matthews DR, Neil HAW. 10-year follow-up of intensive glucose control in type 2 diabetes. *N Eng J Med* 2008; 359: 1577-1589.
7. Chow CK, Jolly S, Rao-Melachini P, Anand SS, Yusuf S. Association of diet, exercise, and smoking modification with risk of early cardiovascular events after acute coronary syndromes. *Circulation* 2010; 121: 750-758.
8. Chow CK, Redfern J, Hills GS et al. Effect of lifestyle-focused text messaging on risk factor modification in patients with coronary heart disease: a randomized clinical trial. *JAMA* 2015; 314: 1255-1263.
9. Lam T, Hoffman DM, Cukier K et al. Temporal HbA1c patterns amongst patients with type 2 diabetes referred for specialist care: Data from the S4S-DINGO-Diabetes Informatics Group. *Diabetes Res Clin Pract* 2016; 116: 159-64.
10. Cheung NW, Yue D, Kotowicz M, Jones P, Flack JR. A comparison of diabetes clinics with different emphasis on routine care, complications assessment and shared care. *Diabetic Med* 2008; 25: 974-8.
11. Chow CK, Arivarathna N, Islam SM, Thiagalingam A, Redfern J. mHealth in cardiovascular health care. *Heart Lung Circ* 2016; 25: 802-807.



12. García-Lizana F, Sarría-Santamera A. New technologies for chronic disease management and control: a systematic review. *J Telemedicine Telecare* 2007; 13: 62-68.
13. Whittaker R, McRobbie H, Bullen C, Rodgers A, Gu Y. Mobile phone-based interventions for smoking cessation. *Cochrane Database Syst Rev* 2016; 11: Cd006611.
14. Thakkar J, Kurup R, Laba TL et al. Mobile telephone text messaging for medication adherence in chronic disease: A meta-analysis. *JAMA Intern Med* 2016; 176: 340-9.
15. Siopis GT, Chey T, Allman-Farinelli M. A systematic review and meta-analysis of interventions for weight management using text messaging. *J Hum Nutr Diet* 2015; 28 Suppl 2: 1-15.
16. Klimis H, Khan EM, Kok C, Chow CK. The role of text messaging in cardiovascular risk factor optimisation. *Curr Cardiol Rep* 2017; 19: 4.
17. Muntaner A, Vidal Conti J, Palou P. Increasing physical activity through mobile device interventions: A systematic review. *Health Informatics J* 2016; 22: 45-69.
18. Arambepola C, Ricci-Cabello I, Manikavasagam P, Roberts N, French DP, Farmer A. The impact of automated brief messages promoting lifestyle changes delivered via mobile devices to people with type 2 diabetes: A systematic literature review and meta-analysis of controlled trials. *J Internet Res* 2016; 18: 1.
19. Buis LR, Hirzel L, Turske SA, Des Jardins TR, Yarandi H, Bondurant P. Use of a text message program to raise type 2 diabetes risk awareness and promote health behavior change (part II): assessment of participants' perceptions on efficacy. *J Med Internet Res* 2013; 15: e282.
20. Islam SMS, Niessen L, Ferrari U, Ali L, Seissler J, Lechner A. Effects of mobile phone SMS to improve glycemic control among patients with type 2 diabetes in Bangladesh: A prospective, parallel-group, randomized controlled trial. *Diabetes Care* 2015; 38: 112-113.
21. Cheung NW, Crampton M, Nesire V, Hng TM, Chow CK. Model for integrated care for chronic disease in the Australian context: Western Sydney Integrated Care Program. *Aust Health Rev*, in press.
22. Redfern J, Thiagalingam A, Jan S, Whittaker R, Hackett ML, Mooney J et al. Development of a set of mobile phone text messages designed for prevention of recurrent cardiovascular events. *Eur J Prev Cardiol* 2014; 21: 492-9.

23. Chow CK, Redfern J, Thiagalingam A et al. Design and rationale of the tobacco, exercise and diet messages (TEXT ME) trial of a text message-based intervention for ongoing prevention of cardiovascular disease in people with coronary disease: a randomised controlled trial protocol. *BMJ Open* 2012; 2: e000606.
24. World Health Organization. Global physical activity questionnaire (GPAQ) analysis guide. Geneva: World Health Organization, 2012.
25. Maruish, M., User's manual for the SF-12v2 Health Survey. Lincoln, RI: QualityMetric, 2012.
26. Williams LS, Brizendine EJ, Plue L, et al. Performance of the PHQ-9 as a screening tool for depression after stroke. *Stroke* 2005;36:635e8.
27. The WHO STEPwise approach to chronic disease risk factor surveillance (STEPS). Available from <http://www.who.int/ncds/surveillance/steps/instrument/en/>. Last accessed June 3, 2018.
28. Blood Pressure Lowering Treatment Trialists' Collaboration. Blood pressure lowering and major cardiovascular events in people with and without chronic kidney disease: meta-analysis of randomised controlled trials. *Br Med J* 2013; 347:f5680.
29. Stratton, I.M., et al., Association of glycaemia with macrovascular and microvascular complications of type 2 diabetes (UKPDS 35): prospective observational study. *Br Med J* 2000; 321: 405-412.
30. Schulz KF, Altman DG, Moher D. Consort 2010 statement: updated guidelines for reporting parallel group randomised trials. *BMJ* 2010; 340: c332.
31. Chan A-W, Tetzlaff JM, Altman DG, Laupacis A, Gøtzsche PC, Krleža-Jerić K et al. SPIRIT 2013 Statement: Defining standard protocol items for clinical trials. *Ann Intern Med* 2013; 158: 200-207
32. Suter E, Oelke ND, Adair CE, Armitage GD. Ten key principles for successful health systems integration. *Healthc Q* 2009; 13: 16-23.
33. Jones KR, Lekhak N, Kaewluang N. Using Mobile Phones and Short Message Service to Deliver Self-Management Interventions for Chronic Conditions: A Meta-Review. *Worldviews Evid Based Nurs* 2014; 11: 81-88.
34. Dobson R, Whittaker R, Jiang Y et al. Effectiveness of text message based, diabetes self management support programme (SMS4BG): two arm, parallel randomised controlled trial. *Br Med J* 2018; 361: k1959.

- 1  
2  
3 35. Australian Institute of Health and Welfare 2016. Australia's health 2016. Australia's  
4 health series no. 15. Cat. no. AUS 199. Canberra: AIHW 2016.  
5  
6  
7 36. Thakkar J, Karhikeyan G, Purohit G, Thakkar S, Sharma J, Verma S, et al. Development of  
8 macaronic Hindi-English 'Hinglish' text message content for a coronary heart disease  
9 secondary prevention programme. Heart Asia 2016; 8: 32-38.  
10  
11  
12

### 13 **Statement of License to BMJ**

14

15  
16 I, N Wah Cheung, the Corresponding Author of this article contained within the original  
17 manuscript which includes any diagrams & photographs, other illustrative material, video,  
18 film or any other material howsoever submitted by the Contributor(s) at any time and  
19 related to the Contribution ("the Contribution") have the right to grant on behalf of all  
20 authors and do grant on behalf of all authors, a licence to the BMJ Publishing Group Ltd and  
21 its licensees, to permit this Contribution (if accepted) to be published in BMJ Open and any  
22 other BMJ Group products and to exploit all subsidiary rights, as set out in the licence at:  
23 ([http://group.bmj.com/products/journals/instructions-for-authors/BMJOpen\\_licence.pdf](http://group.bmj.com/products/journals/instructions-for-authors/BMJOpen_licence.pdf))  
24  
25  
26  
27  
28  
29  
30  
31  
32  
33  
34  
35  
36  
37  
38  
39  
40  
41  
42  
43  
44  
45  
46  
47  
48  
49  
50  
51  
52  
53  
54  
55  
56  
57  
58  
59  
60

1  
2  
3 Figure Legend  
4  
5  
6

7 Figure 1. Study flow diagram. CAD, coronary artery disease.  
8  
9  
10  
11  
12  
13  
14  
15  
16  
17  
18  
19  
20  
21  
22  
23  
24  
25  
26  
27  
28  
29  
30  
31  
32  
33  
34  
35  
36  
37  
38  
39  
40  
41  
42  
43  
44  
45  
46  
47  
48  
49  
50  
51  
52  
53  
54  
55  
56  
57  
58  
59  
60

For peer review only



Figure 1: Summary of protocol

254x190mm (96 x 96 DPI)

# Reporting checklist for protocol of a clinical trial.

Based on the SPIRIT guidelines.

## Instructions to authors

Complete this checklist by entering the page numbers from your manuscript where readers will find each of the items listed below.

Your article may not currently address all the items on the checklist. Please modify your text to include the missing information. If you are certain that an item does not apply, please write "n/a" and provide a short explanation.

Upload your completed checklist as an extra file when you submit to a journal.

In your methods section, say that you used the SPIRIT reporting guidelines, and cite them as:

Chan A-W, Tetzlaff JM, Altman DG, Laupacis A, Gøtzsche PC, Krleža-Jerić K, Hróbjartsson A, Mann H, Dickersin K, Berlin J, Doré C, Parulekar W, Summerskill W, Groves T, Schulz K, Sox H, Rockhold FW, Rennie D, Moher D. SPIRIT 2013 Statement: Defining standard protocol items for clinical trials. *Ann Intern Med.* 2013;158(3):200-207

|                                             |                     | Reporting Item                                                                                               | Page Number |
|---------------------------------------------|---------------------|--------------------------------------------------------------------------------------------------------------|-------------|
| Title                                       | <a href="#">#1</a>  | Descriptive title identifying the study design, population, interventions, and, if applicable, trial acronym | 1           |
| Trial registration                          | <a href="#">#2a</a> | Trial identifier and registry name. If not yet registered, name of intended registry                         | 3, 13       |
| Trial registration: data set                | <a href="#">#2b</a> | All items from the World Health Organization Trial Registration Data Set                                     | 13          |
| Protocol version                            | <a href="#">#3</a>  | Date and version identifier                                                                                  | 4           |
| Funding                                     | <a href="#">#4</a>  | Sources and types of financial, material, and other support                                                  | 16          |
| Roles and responsibilities: contributorship | <a href="#">#5a</a> | Names, affiliations, and roles of protocol contributors                                                      | 1, 16       |
| Roles and responsibilities:                 | <a href="#">#5b</a> | Name and contact information for the trial sponsor                                                           | N/A         |

|    |                      |                      |                                                                   |          |
|----|----------------------|----------------------|-------------------------------------------------------------------|----------|
| 1  | sponsor contact      |                      |                                                                   |          |
| 2  | information          |                      |                                                                   |          |
| 3  |                      |                      |                                                                   |          |
| 4  | Roles and            | <a href="#">#5c</a>  | Role of study sponsor and funders, if any, in study design;       | N/A      |
| 5  | responsibilities:    |                      | collection, management, analysis, and interpretation of           |          |
| 6  | sponsor and funder   |                      | data; writing of the report; and the decision to submit the       |          |
| 7  |                      |                      | report for publication, including whether they will have          |          |
| 8  |                      |                      | ultimate authority over any of these activities                   |          |
| 9  |                      |                      |                                                                   |          |
| 10 |                      |                      |                                                                   |          |
| 11 |                      |                      |                                                                   |          |
| 12 | Roles and            | <a href="#">#5d</a>  | Composition, roles, and responsibilities of the coordinating      | 13       |
| 13 | responsibilities:    |                      | centre, steering committee, endpoint adjudication                 |          |
| 14 | committees           |                      | committee, data management team, and other individuals            |          |
| 15 |                      |                      | or groups overseeing the trial, if applicable (see Item 21a       |          |
| 16 |                      |                      | for data monitoring committee)                                    |          |
| 17 |                      |                      |                                                                   |          |
| 18 |                      |                      |                                                                   |          |
| 19 |                      |                      |                                                                   |          |
| 20 | Background and       | <a href="#">#6a</a>  | Description of research question and justification for            | 5-6, 14- |
| 21 | rationale            |                      | undertaking the trial, including summary of relevant studies      | 15       |
| 22 |                      |                      | (published and unpublished) examining benefits and harms          |          |
| 23 |                      |                      | for each intervention                                             |          |
| 24 |                      |                      |                                                                   |          |
| 25 |                      |                      |                                                                   |          |
| 26 |                      |                      |                                                                   |          |
| 27 | Background and       | <a href="#">#6b</a>  | Explanation for choice of comparators                             | 8        |
| 28 | rationale: choice of |                      |                                                                   |          |
| 29 | comparators          |                      |                                                                   |          |
| 30 |                      |                      |                                                                   |          |
| 31 |                      |                      |                                                                   |          |
| 32 | Objectives           | <a href="#">#7</a>   | Specific objectives or hypotheses                                 | 6, 14    |
| 33 |                      |                      |                                                                   |          |
| 34 |                      |                      |                                                                   |          |
| 35 | Trial design         | <a href="#">#8</a>   | Description of trial design including type of trial (eg, parallel | 6-7      |
| 36 |                      |                      | group, crossover, factorial, single group), allocation ratio,     |          |
| 37 |                      |                      | and framework (eg, superiority, equivalence, non-                 |          |
| 38 |                      |                      | inferiority, exploratory)                                         |          |
| 39 |                      |                      |                                                                   |          |
| 40 |                      |                      |                                                                   |          |
| 41 |                      |                      |                                                                   |          |
| 42 | Study setting        | <a href="#">#9</a>   | Description of study settings (eg, community clinic,              | 7        |
| 43 |                      |                      | academic hospital) and list of countries where data will be       |          |
| 44 |                      |                      | collected. Reference to where list of study sites can be          |          |
| 45 |                      |                      | obtained                                                          |          |
| 46 |                      |                      |                                                                   |          |
| 47 |                      |                      |                                                                   |          |
| 48 | Eligibility criteria | <a href="#">#10</a>  | Inclusion and exclusion criteria for participants. If             | 7        |
| 49 |                      |                      | applicable, eligibility criteria for study centres and            |          |
| 50 |                      |                      | individuals who will perform the interventions (eg,               |          |
| 51 |                      |                      | surgeons, psychotherapists)                                       |          |
| 52 |                      |                      |                                                                   |          |
| 53 |                      |                      |                                                                   |          |
| 54 |                      |                      |                                                                   |          |
| 55 | Interventions:       | <a href="#">#11a</a> | Interventions for each group with sufficient detail to allow      | 8-10     |
| 56 | description          |                      | replication, including how and when they will be                  |          |
| 57 |                      |                      | administered                                                      |          |
| 58 |                      |                      |                                                                   |          |
| 59 |                      |                      |                                                                   |          |
| 60 |                      |                      |                                                                   |          |

|                                                                |                                    |                      |                                                                                                                                                                                                                                                                                                                                                                                |                 |
|----------------------------------------------------------------|------------------------------------|----------------------|--------------------------------------------------------------------------------------------------------------------------------------------------------------------------------------------------------------------------------------------------------------------------------------------------------------------------------------------------------------------------------|-----------------|
| 1<br>2<br>3<br>4<br>5<br>6<br>7                                | Interventions:<br>modifications    | <a href="#">#11b</a> | Criteria for discontinuing or modifying allocated interventions for a given trial participant (eg, drug dose change in response to harms, participant request, or improving / worsening disease)                                                                                                                                                                               | N/A             |
| 8<br>9<br>10<br>11<br>12                                       | Interventions:<br>adherence        | <a href="#">#11c</a> | Strategies to improve adherence to intervention protocols, and any procedures for monitoring adherence (eg, drug tablet return; laboratory tests)                                                                                                                                                                                                                              | N/A             |
| 13<br>14<br>15<br>16                                           | Interventions:<br>concomitant care | <a href="#">#11d</a> | Relevant concomitant care and interventions that are permitted or prohibited during the trial                                                                                                                                                                                                                                                                                  | N/A             |
| 17<br>18<br>19<br>20<br>21<br>22<br>23<br>24<br>25<br>26<br>27 | Outcomes                           | <a href="#">#12</a>  | Primary, secondary, and other outcomes, including the specific measurement variable (eg, systolic blood pressure), analysis metric (eg, change from baseline, final value, time to event), method of aggregation (eg, median, proportion), and time point for each outcome. Explanation of the clinical relevance of chosen efficacy and harm outcomes is strongly recommended | 10-12           |
| 28<br>29<br>30<br>31<br>32<br>33<br>34                         | Participant timeline               | <a href="#">#13</a>  | Time schedule of enrolment, interventions (including any run-ins and washouts), assessments, and visits for participants. A schematic diagram is highly recommended (see Figure)                                                                                                                                                                                               | 10,<br>Figure 1 |
| 35<br>36<br>37<br>38<br>39<br>40<br>41                         | Sample size                        | <a href="#">#14</a>  | Estimated number of participants needed to achieve study objectives and how it was determined, including clinical and statistical assumptions supporting any sample size calculations                                                                                                                                                                                          | 12              |
| 42<br>43<br>44<br>45                                           | Recruitment                        | <a href="#">#15</a>  | Strategies for achieving adequate participant enrolment to reach target sample size                                                                                                                                                                                                                                                                                            | 6-7             |
| 46<br>47<br>48<br>49<br>50<br>51<br>52<br>53<br>54<br>55<br>56 | Allocation: sequence<br>generation | <a href="#">#16a</a> | Method of generating the allocation sequence (eg, computer-generated random numbers), and list of any factors for stratification. To reduce predictability of a random sequence, details of any planned restriction (eg, blocking) should be provided in a separate document that is unavailable to those who enrol participants or assign interventions                       | 7               |
| 57<br>58<br>59<br>60                                           | Allocation<br>concealment          | <a href="#">#16b</a> | Mechanism of implementing the allocation sequence (eg, central telephone; sequentially numbered, opaque, sealed                                                                                                                                                                                                                                                                | 7               |



|    |                        |                      |                                                                                                                                                                                                                                                                                                                                                                                                              |              |
|----|------------------------|----------------------|--------------------------------------------------------------------------------------------------------------------------------------------------------------------------------------------------------------------------------------------------------------------------------------------------------------------------------------------------------------------------------------------------------------|--------------|
| 1  | mechanism              |                      | envelopes), describing any steps to conceal the sequence until interventions are assigned                                                                                                                                                                                                                                                                                                                    |              |
| 2  |                        |                      |                                                                                                                                                                                                                                                                                                                                                                                                              |              |
| 3  |                        |                      |                                                                                                                                                                                                                                                                                                                                                                                                              |              |
| 4  | Allocation:            | <a href="#">#16c</a> | Who will generate the allocation sequence, who will enrol participants, and who will assign participants to interventions                                                                                                                                                                                                                                                                                    | 7            |
| 5  | implementation         |                      |                                                                                                                                                                                                                                                                                                                                                                                                              |              |
| 6  |                        |                      |                                                                                                                                                                                                                                                                                                                                                                                                              |              |
| 7  |                        |                      |                                                                                                                                                                                                                                                                                                                                                                                                              |              |
| 8  |                        |                      |                                                                                                                                                                                                                                                                                                                                                                                                              |              |
| 9  | Blinding (masking)     | <a href="#">#17a</a> | Who will be blinded after assignment to interventions (eg, trial participants, care providers, outcome assessors, data analysts), and how                                                                                                                                                                                                                                                                    | 7, 10        |
| 10 |                        |                      |                                                                                                                                                                                                                                                                                                                                                                                                              |              |
| 11 |                        |                      |                                                                                                                                                                                                                                                                                                                                                                                                              |              |
| 12 |                        |                      |                                                                                                                                                                                                                                                                                                                                                                                                              |              |
| 13 |                        |                      |                                                                                                                                                                                                                                                                                                                                                                                                              |              |
| 14 | Blinding (masking):    | <a href="#">#17b</a> | If blinded, circumstances under which unblinding is permissible, and procedure for revealing a participant's allocated intervention during the trial                                                                                                                                                                                                                                                         | N/A          |
| 15 | emergency              |                      |                                                                                                                                                                                                                                                                                                                                                                                                              |              |
| 16 | unblinding             |                      |                                                                                                                                                                                                                                                                                                                                                                                                              |              |
| 17 |                        |                      |                                                                                                                                                                                                                                                                                                                                                                                                              |              |
| 18 |                        |                      |                                                                                                                                                                                                                                                                                                                                                                                                              |              |
| 19 |                        |                      |                                                                                                                                                                                                                                                                                                                                                                                                              |              |
| 20 | Data collection plan   | <a href="#">#18a</a> | Plans for assessment and collection of outcome, baseline, and other trial data, including any related processes to promote data quality (eg, duplicate measurements, training of assessors) and a description of study instruments (eg, questionnaires, laboratory tests) along with their reliability and validity, if known. Reference to where data collection forms can be found, if not in the protocol | 10-11        |
| 21 |                        |                      |                                                                                                                                                                                                                                                                                                                                                                                                              |              |
| 22 |                        |                      |                                                                                                                                                                                                                                                                                                                                                                                                              |              |
| 23 |                        |                      |                                                                                                                                                                                                                                                                                                                                                                                                              |              |
| 24 |                        |                      |                                                                                                                                                                                                                                                                                                                                                                                                              |              |
| 25 |                        |                      |                                                                                                                                                                                                                                                                                                                                                                                                              |              |
| 26 |                        |                      |                                                                                                                                                                                                                                                                                                                                                                                                              |              |
| 27 |                        |                      |                                                                                                                                                                                                                                                                                                                                                                                                              |              |
| 28 |                        |                      |                                                                                                                                                                                                                                                                                                                                                                                                              |              |
| 29 |                        |                      |                                                                                                                                                                                                                                                                                                                                                                                                              |              |
| 30 |                        |                      |                                                                                                                                                                                                                                                                                                                                                                                                              |              |
| 31 | Data collection plan:  | <a href="#">#18b</a> | Plans to promote participant retention and complete follow-up, including list of any outcome data to be collected for participants who discontinue or deviate from intervention protocols                                                                                                                                                                                                                    | 10           |
| 32 | retention              |                      |                                                                                                                                                                                                                                                                                                                                                                                                              |              |
| 33 |                        |                      |                                                                                                                                                                                                                                                                                                                                                                                                              |              |
| 34 |                        |                      |                                                                                                                                                                                                                                                                                                                                                                                                              |              |
| 35 |                        |                      |                                                                                                                                                                                                                                                                                                                                                                                                              |              |
| 36 |                        |                      |                                                                                                                                                                                                                                                                                                                                                                                                              |              |
| 37 |                        |                      |                                                                                                                                                                                                                                                                                                                                                                                                              |              |
| 38 | Data management        | <a href="#">#19</a>  | Plans for data entry, coding, security, and storage, including any related processes to promote data quality (eg, double data entry; range checks for data values). Reference to where details of data management procedures can be found, if not in the protocol                                                                                                                                            | 7, 10-11, 13 |
| 39 |                        |                      |                                                                                                                                                                                                                                                                                                                                                                                                              |              |
| 40 |                        |                      |                                                                                                                                                                                                                                                                                                                                                                                                              |              |
| 41 |                        |                      |                                                                                                                                                                                                                                                                                                                                                                                                              |              |
| 42 |                        |                      |                                                                                                                                                                                                                                                                                                                                                                                                              |              |
| 43 |                        |                      |                                                                                                                                                                                                                                                                                                                                                                                                              |              |
| 44 |                        |                      |                                                                                                                                                                                                                                                                                                                                                                                                              |              |
| 45 |                        |                      |                                                                                                                                                                                                                                                                                                                                                                                                              |              |
| 46 | Statistics: outcomes   | <a href="#">#20a</a> | Statistical methods for analysing primary and secondary outcomes. Reference to where other details of the statistical analysis plan can be found, if not in the protocol                                                                                                                                                                                                                                     | 12           |
| 47 |                        |                      |                                                                                                                                                                                                                                                                                                                                                                                                              |              |
| 48 |                        |                      |                                                                                                                                                                                                                                                                                                                                                                                                              |              |
| 49 |                        |                      |                                                                                                                                                                                                                                                                                                                                                                                                              |              |
| 50 |                        |                      |                                                                                                                                                                                                                                                                                                                                                                                                              |              |
| 51 | Statistics: additional | <a href="#">#20b</a> | Methods for any additional analyses (eg, subgroup and adjusted analyses)                                                                                                                                                                                                                                                                                                                                     | N/A          |
| 52 | analyses               |                      |                                                                                                                                                                                                                                                                                                                                                                                                              |              |
| 53 |                        |                      |                                                                                                                                                                                                                                                                                                                                                                                                              |              |
| 54 |                        |                      |                                                                                                                                                                                                                                                                                                                                                                                                              |              |
| 55 | Statistics: analysis   | <a href="#">#20c</a> | Definition of analysis population relating to protocol non-adherence (eg, as randomised analysis), and any statistical methods to handle missing data (eg, multiple                                                                                                                                                                                                                                          | N/A          |
| 56 | population and         |                      |                                                                                                                                                                                                                                                                                                                                                                                                              |              |
| 57 | missing data           |                      |                                                                                                                                                                                                                                                                                                                                                                                                              |              |
| 58 |                        |                      |                                                                                                                                                                                                                                                                                                                                                                                                              |              |
| 59 |                        |                      |                                                                                                                                                                                                                                                                                                                                                                                                              |              |

|    |                    |                      |                                                                 |
|----|--------------------|----------------------|-----------------------------------------------------------------|
| 1  |                    | imputation)          |                                                                 |
| 2  | Data monitoring:   | <a href="#">#21a</a> | Composition of data monitoring committee (DMC);                 |
| 3  | formal committee   |                      | summary of its role and reporting structure; statement of       |
| 4  |                    |                      | whether it is independent from the sponsor and competing        |
| 5  |                    |                      | interests; and reference to where further details about its     |
| 6  |                    |                      | charter can be found, if not in the protocol. Alternatively, an |
| 7  |                    |                      | explanation of why a DMC is not needed                          |
| 8  |                    |                      |                                                                 |
| 9  |                    |                      |                                                                 |
| 10 |                    |                      |                                                                 |
| 11 |                    |                      |                                                                 |
| 12 | Data monitoring:   | <a href="#">#21b</a> | Description of any interim analyses and stopping                |
| 13 | interim analysis   |                      | guidelines, including who will have access to these interim     |
| 14 |                    |                      | results and make the final decision to terminate the trial      |
| 15 |                    |                      |                                                                 |
| 16 |                    |                      |                                                                 |
| 17 | Harms              | <a href="#">#22</a>  | Plans for collecting, assessing, reporting, and managing        |
| 18 |                    |                      | solicited and spontaneously reported adverse events and         |
| 19 |                    |                      | other unintended effects of trial interventions or trial        |
| 20 |                    |                      | conduct                                                         |
| 21 |                    |                      |                                                                 |
| 22 |                    |                      |                                                                 |
| 23 |                    |                      |                                                                 |
| 24 | Auditing           | <a href="#">#23</a>  | Frequency and procedures for auditing trial conduct, if any,    |
| 25 |                    |                      | and whether the process will be independent from                |
| 26 |                    |                      | investigators and the sponsor                                   |
| 27 |                    |                      |                                                                 |
| 28 |                    |                      |                                                                 |
| 29 |                    |                      |                                                                 |
| 30 | Research ethics    | <a href="#">#24</a>  | Plans for seeking research ethics committee / institutional     |
| 31 | approval           |                      | review board (REC / IRB) approval                               |
| 32 |                    |                      |                                                                 |
| 33 |                    |                      |                                                                 |
| 34 | Protocol           | <a href="#">#25</a>  | Plans for communicating important protocol modifications        |
| 35 | amendments         |                      | (eg, changes to eligibility criteria, outcomes, analyses) to    |
| 36 |                    |                      | relevant parties (eg, investigators, REC / IRBs, trial          |
| 37 |                    |                      | participants, trial registries, journals, regulators)           |
| 38 |                    |                      |                                                                 |
| 39 |                    |                      |                                                                 |
| 40 | Consent or assent  | <a href="#">#26a</a> | Who will obtain informed consent or assent from potential       |
| 41 |                    |                      | trial participants or authorised surrogates, and how (see       |
| 42 |                    |                      | Item 32)                                                        |
| 43 |                    |                      |                                                                 |
| 44 |                    |                      |                                                                 |
| 45 |                    |                      |                                                                 |
| 46 | Consent or assent: | <a href="#">#26b</a> | Additional consent provisions for collection and use of         |
| 47 | ancillary studies  |                      | participant data and biological specimens in ancillary          |
| 48 |                    |                      | studies, if applicable                                          |
| 49 |                    |                      |                                                                 |
| 50 |                    |                      |                                                                 |
| 51 | Confidentiality    | <a href="#">#27</a>  | How personal information about potential and enrolled           |
| 52 |                    |                      | participants will be collected, shared, and maintained in       |
| 53 |                    |                      | order to protect confidentiality before, during, and after the  |
| 54 |                    |                      | trial                                                           |
| 55 |                    |                      |                                                                 |
| 56 |                    |                      |                                                                 |
| 57 |                    |                      |                                                                 |
| 58 | Declaration of     | <a href="#">#28</a>  | Financial and other competing interests for principal           |
| 59 |                    |                      |                                                                 |
| 60 |                    |                      |                                                                 |

|    |                                             |                      |                                                                                                                                                                                                                                                                                     |          |
|----|---------------------------------------------|----------------------|-------------------------------------------------------------------------------------------------------------------------------------------------------------------------------------------------------------------------------------------------------------------------------------|----------|
| 1  | interests                                   |                      | investigators for the overall trial and each study site                                                                                                                                                                                                                             |          |
| 2  | Data access                                 | <a href="#">#29</a>  | Statement of who will have access to the final trial dataset, and disclosure of contractual agreements that limit such access for investigators                                                                                                                                     | 13       |
| 3  |                                             |                      |                                                                                                                                                                                                                                                                                     |          |
| 4  |                                             |                      |                                                                                                                                                                                                                                                                                     |          |
| 5  |                                             |                      |                                                                                                                                                                                                                                                                                     |          |
| 6  |                                             |                      |                                                                                                                                                                                                                                                                                     |          |
| 7  | Ancillary and post trial care               | <a href="#">#30</a>  | Provisions, if any, for ancillary and post-trial care, and for compensation to those who suffer harm from trial participation                                                                                                                                                       | N/A      |
| 8  |                                             |                      |                                                                                                                                                                                                                                                                                     |          |
| 9  |                                             |                      |                                                                                                                                                                                                                                                                                     |          |
| 10 |                                             |                      |                                                                                                                                                                                                                                                                                     |          |
| 11 |                                             |                      |                                                                                                                                                                                                                                                                                     |          |
| 12 |                                             |                      |                                                                                                                                                                                                                                                                                     |          |
| 13 | Dissemination policy: trial results         | <a href="#">#31a</a> | Plans for investigators and sponsor to communicate trial results to participants, healthcare professionals, the public, and other relevant groups (eg, via publication, reporting in results databases, or other data sharing arrangements), including any publication restrictions | 13       |
| 14 |                                             |                      |                                                                                                                                                                                                                                                                                     |          |
| 15 |                                             |                      |                                                                                                                                                                                                                                                                                     |          |
| 16 |                                             |                      |                                                                                                                                                                                                                                                                                     |          |
| 17 |                                             |                      |                                                                                                                                                                                                                                                                                     |          |
| 18 |                                             |                      |                                                                                                                                                                                                                                                                                     |          |
| 19 |                                             |                      |                                                                                                                                                                                                                                                                                     |          |
| 20 |                                             |                      |                                                                                                                                                                                                                                                                                     |          |
| 21 | Dissemination policy: authorship            | <a href="#">#31b</a> | Authorship eligibility guidelines and any intended use of professional writers                                                                                                                                                                                                      | 14       |
| 22 |                                             |                      |                                                                                                                                                                                                                                                                                     |          |
| 23 |                                             |                      |                                                                                                                                                                                                                                                                                     |          |
| 24 |                                             |                      |                                                                                                                                                                                                                                                                                     |          |
| 25 | Dissemination policy: reproducible research | <a href="#">#31c</a> | Plans, if any, for granting public access to the full protocol, participant-level dataset, and statistical code                                                                                                                                                                     | 13       |
| 26 |                                             |                      |                                                                                                                                                                                                                                                                                     |          |
| 27 |                                             |                      |                                                                                                                                                                                                                                                                                     |          |
| 28 |                                             |                      |                                                                                                                                                                                                                                                                                     |          |
| 29 |                                             |                      |                                                                                                                                                                                                                                                                                     |          |
| 30 | Informed consent materials                  | <a href="#">#32</a>  | Model consent form and other related documentation given to participants and authorised surrogates                                                                                                                                                                                  | Appendix |
| 31 |                                             |                      |                                                                                                                                                                                                                                                                                     |          |
| 32 |                                             |                      |                                                                                                                                                                                                                                                                                     |          |
| 33 |                                             |                      |                                                                                                                                                                                                                                                                                     |          |
| 34 | Biological specimens                        | <a href="#">#33</a>  | Plans for collection, laboratory evaluation, and storage of biological specimens for genetic or molecular analysis in the current trial and for future use in ancillary studies, if applicable                                                                                      | N/A      |
| 35 |                                             |                      |                                                                                                                                                                                                                                                                                     |          |
| 36 |                                             |                      |                                                                                                                                                                                                                                                                                     |          |
| 37 |                                             |                      |                                                                                                                                                                                                                                                                                     |          |
| 38 |                                             |                      |                                                                                                                                                                                                                                                                                     |          |
| 39 |                                             |                      |                                                                                                                                                                                                                                                                                     |          |
| 40 |                                             |                      |                                                                                                                                                                                                                                                                                     |          |

41 The SPIRIT checklist is distributed under the terms of the Creative Commons Attribution License CC-  
 42 BY-ND 3.0. This checklist can be completed online using <https://www.goodreports.org/>, a tool made  
 43 by the [EQUATOR Network](#) in collaboration with [Penelope.ai](#)  
 44  
 45  
 46  
 47  
 48  
 49  
 50  
 51  
 52  
 53  
 54  
 55  
 56  
 57  
 58  
 59  
 60
